# Supplementary material for: Estimating the risk of cardiovascular disease using an obese-years metric
Source: PubMed Central journal article supplement — BMJ Open. 2014 Sep 17;4(9):e005629. doi: 10.1136/bmjopen-2014-005629 (PMC4166414; doi:10.1136/bmjopen-2014-005629), 2014-09-17
Supplement: bmjopen-2014-005629.draft_revisions.pdf [file bmjopen-2014-005629.draft_revisions.pdf]

# BMJ Open

## Estimating the risk of cardiovascular disease using an obese-years metric

|                                 |                                                                                                                                                                                                                                                                                                                                                                                                                                                                                                                                                                                                                                                                                                                                                    |
|---------------------------------|----------------------------------------------------------------------------------------------------------------------------------------------------------------------------------------------------------------------------------------------------------------------------------------------------------------------------------------------------------------------------------------------------------------------------------------------------------------------------------------------------------------------------------------------------------------------------------------------------------------------------------------------------------------------------------------------------------------------------------------------------|
| Journal:                        | <i>BMJ Open</i>                                                                                                                                                                                                                                                                                                                                                                                                                                                                                                                                                                                                                                                                                                                                    |
| Manuscript ID:                  | bmjopen-2014-005629                                                                                                                                                                                                                                                                                                                                                                                                                                                                                                                                                                                                                                                                                                                                |
| Article Type:                   | Research                                                                                                                                                                                                                                                                                                                                                                                                                                                                                                                                                                                                                                                                                                                                           |
| Date Submitted by the Author:   | 05-May-2014                                                                                                                                                                                                                                                                                                                                                                                                                                                                                                                                                                                                                                                                                                                                        |
| Complete List of Authors:       | Abdullah, Asnawi; Faculty of Public Health, University Muhammadiyah Aceh, Biostatistics and Population Health; Monash University, Department Epidemiology and Preventive Medicine, Amin, Fauzi; Faculty of Public Health, University Muhammadiyah Aceh, Public Health Nutrition<br>Stoelwinder, Johannes; Monash University, Epidemiology and Preventive Medicine<br>Tanamas, Stephanie; Baker IDI Heart and Diabetes Institute, Wolf, Rory; Monash University, Epidemiology and Preventive Medicine<br>Barendregt, Jan; University of Queensland, School of Population Health<br>Peeters, Anna; Baker IDI Heart and Diabetes Institute, Obesity and Population Health; Baker IDI Heart and Diabetes Institute, Clinical Diabetes and Epidemiology |
| <b>Primary Subject Heading</b>: | Epidemiology                                                                                                                                                                                                                                                                                                                                                                                                                                                                                                                                                                                                                                                                                                                                       |
| Secondary Subject Heading:      | Nutrition and metabolism, Public health, Cardiovascular medicine                                                                                                                                                                                                                                                                                                                                                                                                                                                                                                                                                                                                                                                                                   |
| Keywords:                       | EPIDEMIOLOGY, PUBLIC HEALTH, VASCULAR MEDICINE, Risk management < HEALTH SERVICES ADMINISTRATION & MANAGEMENT, Vascular medicine < INTERNAL MEDICINE, NUTRITION & DIETETICS                                                                                                                                                                                                                                                                                                                                                                                                                                                                                                                                                                        |
|                                 |                                                                                                                                                                                                                                                                                                                                                                                                                                                                                                                                                                                                                                                                                                                                                    |

SCHOLARONE™  
Manuscripts

**Title:**

Estimating the risk of cardiovascular disease using an obese-years metric

**Running title:**

Obese-years and cardiovascular disease

**Authors:**

Asnawi Abdullah, PhD<sup>1,3</sup>;

Fauzi Ali Amin, MPH<sup>2</sup>;

Johannes Stoelwinder, MD<sup>3</sup>

Stephanie Tanamas, PhD<sup>4</sup>

Rory Wolf, PhD<sup>3</sup>

Jan Barendregt, PhD<sup>5</sup>

Anna Peeters, PhD<sup>3,4</sup>

**Authors Address:**

<sup>1</sup>*Department of Biostatistics and Population Health. Faculty of Public Health, University Muhammadiyah Aceh, Indonesia.*

<sup>2</sup>*Department of Public Health Nutrition. Faculty of Public Health, University Muhammadiyah Aceh, Indonesia*

<sup>3</sup>*Department of Epidemiology and Preventive Medicine, School of Public Health and Preventive Medicine, Monash University, Australia;*

<sup>4</sup>*Baker IDI Heart and Diabetes Institute, Australia;*

<sup>5</sup>*School of Population Health, University Queensland, Australia.*

1  
2  
3  
4  
5 **Correspondence to:** *Asnawi Abdullah, Department of Biostatistics and Population*  
6 *Health, Faculty of Public Health, University of Muhammadiyah Aceh, Jln. Leung Bata,*  
7 *Batoh, Banda Aceh, Indonesia, 23245. Phone +6265131054, Fax. +6265131053, Email:*  
8 *Asnawi.Abdullah@fkm.unmuha.ac.id*  
9  
10  
11  
12

13  
14  
15  
16  
17 **Word count:**

18 *Text = 2960 words;*

19  
20  
21 *Abstract = 300 words; 25 references, Tables 5*  
22  
23  
24  
25  
26  
27  
28  
29  
30  
31  
32  
33  
34  
35  
36  
37  
38  
39  
40  
41  
42  
43  
44  
45  
46  
47  
48  
49  
50  
51  
52  
53  
54  
55  
56  
57  
58  
59  
60

**ABSTRACT:**

**Objective:** To examine the association between obese-years and the risk of cardiovascular disease.

**Study design:** Prospective cohort study for approximately 50 years of follow-up.

**Setting:** Boston, USA

**Participants:** 5036 participants of the original Framingham Heart Study were examined.

**Methods:** The variable of obese-years was calculated by multiplying for each participant the number of BMI units above 30 kg/m<sup>2</sup> by the number of years lived at that BMI during approximately 50 years of follow-up. The association between obese-years and the outcome was analyzed by using time-dependent Cox regression adjusted for potential confounders and compared with the current models using the Akaike Information Criterion (AIC)

**Primary outcome:** Cardiovascular diseases.

**The Results:** The average cumulative obese-years was 63 (range, 2–556 obese-years). During 138,918 person-years of follow-up, 2753 (55%) participants were diagnosed with cardiovascular disease. The incidence rates and adjusted hazards ratios (AOR) for CVD increased with an increase in the number of obese-years. AOR for the categories 1–24.9, 25–49.9, 50–74.9, and ≥75 obese-years was 1.31 (95% CI: 1.15–1.48), 1.37 (95% CI: 1.14–1.65), 1.62 (95% CI: 1.32–1.99), and 1.80 (95% CI: 1.54–2.10) compared with those who never-obese (zero obese-years) respectively. A dose-response relationship (across the 5 categories) was significant (*P* trend= 0.001). Effect of obese-years was higher in males than females. For every 10 unit increase in obese-years, the AOR of CVD increased by 6% (95% CI 4% to 8%) for males and 3% (95% CI 2% to 4%) for females. The AIC was lowest in the model containing obese-years compared with models containing either the level of BMI or the duration of obesity alone.

**Conclusions:** This study confirm that the obese-years construct is an independent risk factor for CVD. Obese-years metric is a better predictor the risk of CVD although it shows similar risk estimation to other two models.

**Key Words:**

Obesity, BMI, the duration of obesity, obese-years, risk factor, cardiovascular disease

**Strengths and limitations of this study**

- Examining the total effect of obesity by combining the number years lived with obesity and the level of BMI into a single measurement of obese-years
- A long term prospective cohort study - approximately 50 years followed-up with biennial measurements of body weight, covariates and health outcomes.
- The analysis takes into account changes in covariates during study follow-up and adjusted for a large number of potential confounding variables.
- The obese-years construct was developed based on the measurement of BMI. It is unclear whether using anthropometric measures other than BMI would produce different results.
- Data used for this study was from a relatively old cohort study, baseline of the study began in 1948

## Background

Obesity has been associated with an increased risk of cardiovascular disease (CVD)<sup>1,2</sup>.

In addition, we have recently demonstrated that the duration of obesity is also risk factor for type-2 diabetes, independent of level of body mass index (BMI)<sup>3</sup>. However, the quantification of these association by only analysing the level of BMI<sup>4</sup> or the duration lived with obesity<sup>5,6</sup>; this approach may not reflect the total effect of obesity and may underestimated the risk of CVD associated with obesity.

We recently demonstrated the additional benefit of constructs combining the level of obesity with the number of years lived with obesity into a single measure of an obese-years construct is a better predictor the risk of type-2 diabetes than level of BMI or duration of obesity alone<sup>7</sup>. A similar approach that has been used in smoking studies, examining the adverse health effects associated with the combination of number of cigarettes or packs smoked per day (degree) and duration of smoking as a cigarette-years or pack-years<sup>8-10</sup>.

The use of a similar construct for body weight, to estimate the risk of CVD has not been investigated yet. We hypothesized that the obese-years construct is likely a similar independent risk factor for CVD and would provide an improved estimation of the risk of future CVD. This study aimed to examine the association between obese-

1  
2  
3 years and risk of CVD and to examine whether the obese-years construct was a  
4  
5 better predictor for risk of CVD than current BMI or duration of obesity alone. We  
6  
7 investigated these objectives using the original Framingham Heart Study, a long term  
8  
9 prospective cohort study where body weight, health outcomes and other covariates  
10  
11 were measured regularly for almost 50 years <sup>11</sup>.

## 12 13 14 15 16 17 18 19 **METHODS**

### 20 21 22 **Data source**

23  
24 We used data from the original Framingham Heart Study (FHS) <sup>12</sup>. In this prospective  
25  
26 cohort study, 5,209 participants (aged 28–62 years at the time of enrollment) were  
27  
28 examined regularly at 2-years interval for approximately 50 years from 1948. For the  
29  
30 purpose of this study, only participants who were free from CVD (any types), cancer  
31  
32 and type-2 diabetes at baseline included in the analysis ( $n = 5,036$ ).

### 33 34 35 36 37 38 39 40 41 **Variables: measurement, missing and imputation**

42  
43 Most of variables in the FHS was measured regularly at every two-years interval,  
44  
45 including body weight, height, demographic variables, health behaviors, and health  
46  
47 outcomes (including cardiovascular disease) <sup>11</sup>. However some values are missing by  
48  
49 design where variables were not collected at every examination. For example the  
50  
51 variables of current smoking status was not recorded at four examinations (2, 3, 6  
52  
53 and 17), cholesterol was not measured at seven examinations (11, 12, 17-20 and 22),  
54  
55  
56  
57  
58  
59  
60

1  
2  
3 alcohol consumption was measured only in eight examinations (2, 4, 7, 19, 20–23),  
4  
5 and physical activity was measured only at four examinations (4, 11, 12, and 19). For  
6  
7 this circumstance, the nearest measured value of the covariate was used in our  
8  
9 analysis. Another circumstance, the missing values occur intermittently missing one  
10  
11 or more values during study follow-up; for example body weight and hence BMI. In  
12  
13 this case missing values for BMI were imputed with a conditional mean estimated by  
14  
15 a multiple linear regression model using age at prior exam, sex and several  
16  
17 transformations of the previously measured BMI (BMI, log BMI, BMI squared and BMI  
18  
19 as a categorical variable). Methods of measurement of these variables have been  
20  
21 described in detail elsewhere <sup>57</sup>.  
22  
23  
24  
25  
26  
27  
28  
29  
30  
31  
32

### 33 **The level of obesity, duration and obese-years measurement**

34  
35  
36 A participant was considered obese at a given examination if their BMI was greater  
37  
38 than or equal to 30 kg/m<sup>2</sup>. The level of obesity was defined as follows: (1) if BMI < 30  
39  
40 kg/m<sup>2</sup>, the level was zero; and (2) if BMI ≥ 30 kg/m<sup>2</sup>, the level was BMI minus 29  
41  
42 kg/m<sup>2</sup>. For example, if BMI was 35 kg/m<sup>2</sup>, the level was 6 (35 – 29) obese units.  
43  
44  
45  
46  
47  
48  
49

50  
51 The duration of obesity was defined using a similar definition as has been described  
52  
53 previously <sup>5</sup>. The duration of obesity was calculated for those individuals with at least  
54  
55 two consecutive occurrences of obesity (which implies at least two years of being  
56  
57  
58  
59  
60



1  
2  
3 continuously obese), to avoid the potential misclassification of body weight, either  
4  
5 due to measurement error or fluctuations between the borderline of the 'overweight'  
6  
7 category or the 'obese' category. For those individuals without two consecutive  
8  
9 obesity occurrences, duration was considered to be zero at all exams. For those  
10  
11 individuals with two consecutive obesity occurrences the beginning of their obesity  
12  
13 duration interval was defined as the date of the first of these two examinations and  
14  
15 from that time, the individual was considered to be continuously obese until either  
16  
17 the first of two consecutive non-obese examinations, or death, or the end of follow-  
18  
19 up at examination 24. The duration increased incrementally at each exam according  
20  
21 to the time (in years) between the current exam and the first obese examination.  
22  
23  
24  
25  
26  
27  
28  
29 Individuals could have multiple periods of obesity duration during follow-up.  
30  
31  
32  
33  
34  
35

36 The level of obesity and the duration of obesity then was combined into a single  
37  
38 variable called obese-years. The variable was calculated at each examination as the  
39  
40 defined level of obesity (in "obese units") multiplied by the defined duration of  
41  
42 obesity (in years). The cumulative number of obese-years was calculated at each  
43  
44 examination as a sum of all obese-year "exposures" up to and including that  
45  
46  
47  
48  
49 examination as has been illustrated in the previous paper<sup>7</sup>  
50  
51  
52  
53  
54  
55  
56  
57  
58  
59  
60

### Measurement of the outcome and time to event

The main outcome of interest in this study was CVD incident (the first event of any type of CVD; defined as a composite of coronary heart disease (CHD), cerebrovascular accident (CVA), peripheral artery disease, and congestive heart failure (CHF)<sup>13</sup>. Additional outcomes are individual types of CVD: hard CVD, CHD, CVA, and CHF. Hard CVD defined as a composite of hard CHD (coronary death, myocardial infarction), stroke (fatal and nonfatal), peripheral artery disease and heart failure. In the FHS, the criteria for each cardiovascular outcome during follow-up were standardized<sup>14</sup> and a panel of Framingham investigators made the decision regarding diagnosis. CHD includes the diagnoses of (1) angina pectoris, evidenced by a typical history of chest pain on a physician-administered questionnaire; (2) myocardial infarction, determined by specified electrocardiographic changes, diagnostic elevation of serum enzymes with prolonged ischemic chest pain, or autopsy; (3) coronary insufficiency, defined as prolonged ischemic chest pain accompanied by transient ischemic abnormalities on the ECG; and (4) sudden (in less than 1 hour) or non-sudden coronary death. CHF was indicated when at least two major or one major and two minor diagnostic conditions existed concurrently upon examination.

Time to event was measured as the time until the date a participant was diagnosed as having cardiovascular disease. Individuals who died or reached the end of the

1  
2  
3 follow-up (examination 24) before developing CVD were censored at date of death  
4  
5 or examination 24, respectively.  
6  
7  
8  
9

## 10 11 **Data analysis**

12  
13  
14 To model the relationship between the various measures of obesity and risk of CVD,  
15  
16 a dynamic survival model<sup>4</sup> (time-dependent Cox regression model)<sup>15 16</sup> was used. The  
17  
18 demographic and health behavior variables included in the analysis were age, sex,  
19  
20 education level, country of birth, marital status, smoking status, alcohol consumption  
21  
22 (ounces/month), and physical activity. Most of these variables included in the model  
23  
24 were time-varying, except for sex, age (at baseline) and country of birth.  
25  
26  
27  
28  
29  
30  
31  
32  
33

34 The obese-years construct was analysed both as a continuous and as a categorical  
35  
36 variable using a similar categories as using in the previous study<sup>7</sup> for comparison  
37  
38 purpose. For continuous analyses, hazard ratios were presented per 10 obese-years.  
39  
40 For categorical, those who never obese during study follow-up (zero obese-years)  
41  
42 was assigned as a comparator. Those who values of obese-years within the study  
43  
44 follow-up period, then obese-years was grouped into short, medium and long  
45  
46 periods representing 1-24.9, 25-49.9, 50-74.9 and  $\geq 75$  obese-years. Hazard ratios  
47  
48 were presented, both as crude hazard ratios and as multivariate-adjusted hazard  
49  
50 ratios for both continuous and categorical variable. Three models of analysis were  
51  
52  
53  
54  
55  
56  
57  
58  
59  
60

1  
2  
3 used to examine the change in hazard ratios associated with the addition of different  
4  
5 confounding variables. Model 1 adjusted for age. Model 2 adjusted for age, sex,  
6  
7 marital status, educational level and country of birth. Model 3 includes all variables in  
8  
9 model 2 plus health behavior variables of smoking status, alcohol consumption and  
10  
11 physical activity and this model was considered the primary model of the study. The  
12  
13 analyses were additionally stratified by sex and a test for interaction between sex and  
14  
15 obese-years was performed for all models.  
16  
17  
18  
19

20  
21  
22  
23  
24  
25 To compare the predictive value of obesity level, obesity duration and obese-years  
26  
27 construct, each of these three variables were divided into an equal number of  
28  
29 categories. One group was created for those who were never obese (BMI less than 30  
30  
31 kg/m<sup>2</sup>) as a reference. For those with obesity, ten deciles categories were created.  
32  
33  
34 The goodness of fit of the models incorporating each of the three variables was  
35  
36 compared using Akaike's information criterion (AIC), computed as  $-2(\log\text{-likelihood})$   
37  
38  $+ 2$  (number of estimated parameters); with a lower AIC indicating a better fit <sup>17</sup>. All  
39  
40 analyses were performed using the Stata statistical software package version 11.0  
41  
42  
43  
44  
45  
46 (StataCorp, College Station, TX, USA) <sup>18</sup>.  
47  
48  
49  
50  
51  
52  
53  
54  
55  
56  
57  
58  
59  
60

## Sensitivity analyses

A sensitivity analysis was performed to examine whether the association might be influenced by the imputation method for missing BMI; specifically, an analysis was performed that included only participants with no missing values of BMI in any examinations. The effect of the duration of obesity prior to baseline was tested by performing extra analyses that excluded those who were obese at baseline (no = 576).

## RESULTS

### Characteristics of the Respondents

Of the 5,036 eligible study participants, 1230 (24%) participants were obese for at least 2 consecutive examinations during the study follow-up. Mean cumulative duration of obesity was approximately 16 years (range, 2–46 years), and the mean cumulative obese-years was 63 (range, 2–556 obese-years). 2753 (55%) participants were diagnosed with cardiovascular disease over approximately during 138,918 person-years of follow-up (Table 1).

### Incidence and Hazards Ratios of Cardiovascular Disease

The incidence rates and adjusted hazards ratios for CVD increased with an increase in the number of obese-years (Table 2 and Table 3). In the primary model (Model 3) for

1  
2  
3 total population, the adjusted hazard ratios for the categories 1–24.9, 25–49.9, 50–  
4  
5 74.9, and ≥75 obese-years for total population was 1.31 (95% CI: 1.15-1.48), 1.37  
6  
7 (95% CI: 1.14-1.65), 1.62 (95% CI: 1.32-1.99), and 1.80 (95% CI: 1.54-2.10) compared  
8  
9 with those who never-obese (zero obese-years) respectively. A dose-response  
10  
11 relationship (across the 5 categories) was significant ( $P$  trend= 0.001). For continues  
12  
13 analysis, every 10 unit increase in obese-years, the adjusted hazard ratios for CVD in  
14  
15 the total population increased by 4% (95% CI 3% - 4%) (Table 4). There were no  
16  
17 significant interactions between obese-years categories and sex and smoking status  
18  
19 but there was evidence of an interaction between obese-years as a continuous  
20  
21 variable and each of sex ( $P$  value = 0.01). Effect of obese-years was higher in males  
22  
23 than females.  
24  
25  
26  
27  
28  
29  
30  
31  
32  
33

#### 34 **Comparing obesity constructs and Akaike's Information Criterion (AIC),**

35  
36  
37 Table 5 demonstrates the risk of CVD for each of the three different constructs for  
38  
39 obesity: level of obesity (based on BMI), duration of obesity, and the obese-years  
40  
41 construct as additive effects. Each construct was analysed in a separate model and  
42  
43 the strength of association was compared using the Akaike Information Criterion  
44  
45 (AIC). In all outcomes, the AIC was lowest in the construct of obese-years compared  
46  
47 with the other two constructs both in analysis by total population and by sex.  
48  
49  
50  
51  
52  
53  
54  
55  
56  
57  
58  
59  
60

### Sensitivity analysis

The sensitivity analyses showed that the association between obese-years and risk of CVD was similar between a complete case analysis and the analysis using imputed missing values for BMI. Exclusion of participants who had no record of body mass index at baseline has no change in adjusted hazard ratio, but exclusion of those who were obese at baseline showed only a slightly lower adjusted hazard ratio: 1.03 (95% CI: 1.01-1.05)

### DISCUSSION

This study found that the approach of measuring the total effect of obesity by combining the level and the duration of obesity into a single metric of obese-years, is a stronger predictor of the risk of CVD than using the duration of obesity or the intensity of obesity alone. A clear dose-response relation between obese-years and the risk of CVD was observed. The stronger effect was found in males than females

Although the hazard ratios were very similar between three different constructs and it is not possible to perform a statistical comparison of discrimination between the models due to the fact that they are non-nested, the AIC does tell us that combining level of obesity and the duration into a single construct of obese-years provides us with more discriminative power than a model with level of obesity based on BMI or

1  
2  
3 obesity duration alone. This finding has important implications for future studies of  
4  
5 the total health impact associated with obesity that should be taken into account  
6  
7  
8 both the impact of obesity level and changes in the duration of obesity.  
9  
10

11  
12  
13  
14 There are different ways to operationalize the impact of excess weight over time. A  
15 recent systematic review identified at least four models: additive models, duration-  
16 of-obesity model, additive-weight-change model and interactive model <sup>19</sup>. In  
17 addition to these models, the obese-year model confirms that analyzing the  
18 combined effect of the duration and the level of obesity as a predictor of the  
19 cardiovascular is worthwhile. Such approaches add information over and above  
20 simply the level of excess weight or length of time with obesity. As has been argued  
21 previously <sup>7</sup> other potential additions to this analysis is examining the excess body  
22 weight as higher than 25 kg/m<sup>2</sup>.  
23  
24  
25  
26  
27  
28  
29  
30  
31  
32  
33  
34  
35  
36  
37  
38  
39  
40  
41

42 The finding is derived from analysis of a long term prospective cohort study with  
43 biennial measurements of body weight, covariates and health outcomes which  
44 enabled us to analyze change in level of obesity and the duration of obesity over  
45 long term period. The analysis take into account changes in covariates, such as  
46 smoking status, alcohol consumption and physical activity and adjusted for a large  
47 number of potential confounding variables. However, some potential confounders,  
48  
49  
50  
51  
52  
53  
54  
55  
56  
57  
58  
59  
60



1  
2  
3 such as diet, were not collected consistently in the original Framingham Heart Study  
4  
5 and therefore have not been adjusted for in this study.  
6  
7  
8  
9

10  
11 As has been described elsewhere <sup>7</sup>, the limitation of this analysis might related the  
12 population of study using a relatively old cohort study of the original Framingham  
13 Heart Study that began in 1948, and the prevalence rates of obesity and  
14 cardiovascular disease were relatively low at that time (in the 1950s was below  
15 10%)<sup>20</sup>. Therefore some people argued the results of this study might not reflect the  
16 current population, where the prevalence of obesity is markedly higher than 50 years  
17 ago. In 2008 alone, the prevalence of obesity among adults in the United States was  
18 more than 30%<sup>21</sup>. Moreover, the contemporary obesity epidemic is also characterized  
19 by a much earlier onset of obesity, which should result in even longer exposure by  
20 the time today's obese generation of children reach the age of our studied cohort. In  
21 our study, the average age at onset of obesity was approximately 50 years, and the  
22 average number of years lived with obesity was approximately 13 years but, in  
23 today's society, the average age at onset of obesity is likely to be more than 10 years  
24 earlier than in previous decades <sup>22</sup>. However, our results indicate that obese-years is  
25 still valid and is a better tool than level of BMI or duration alone. If further analysis is  
26 conducted, the association between obese-years and CVD could be even stronger  
27 today since the exposure to obesity is now greater than it was.  
28  
29  
30  
31  
32  
33  
34  
35  
36  
37  
38  
39  
40  
41  
42  
43  
44  
45  
46  
47  
48  
49  
50  
51  
52  
53  
54  
55  
56  
57  
58  
59  
60

1  
2  
3 The obese-years construct in this study was based on the measurement of BMI. It is  
4  
5 unclear whether using anthropometric measures other than BMI would produce  
6  
7 different results. Although a recent meta-analysis study has showed that BMI, waist  
8  
9 circumference (WC), and the waist/hip ratio (WHR) to each estimate a similar risk,  
10  
11 particularly type-2 diabetes <sup>23</sup>; it is still worthy to explore the relationship between  
12  
13 obese-years and risk of CVD using WC or WHR.  
14  
15  
16  
17  
18  
19  
20  
21

22 As discussed in our previous study <sup>7</sup>, the obese-years metric was developed based on  
23  
24 assumption that level and duration have a similar impact, an assumption that has  
25  
26 been used for the concept of pack-years in smoking studies. In some smoking  
27  
28 studies it was highlighted that for certain health outcomes, the effect of the duration  
29  
30 was more important than intensity <sup>24</sup>, while in others, duration was not significant  
31  
32 after adjustment for intensity <sup>25</sup>. As this is a new concept in obesity studies, it  
33  
34 requires further exploration. The notion that obese-years is only “switched on” when  
35  
36 BMI reaches 30 kg/m<sup>2</sup> is crude, although it does find a parallel in pack-years for  
37  
38 smoking which is a construct that ignores any effects of passive smoking.  
39  
40  
41  
42  
43  
44  
45  
46  
47  
48  
49

50 This findings demonstrate one again that it is important to consider not only the  
51  
52 level of obesity but also the duration of obesity and its combination when examining  
53  
54 the association between obesity and the risk of chronic disease. This effect is likely to  
55  
56  
57  
58  
59  
60

1  
2  
3 be because account is taken of the cumulative damage of obesity on body systems,  
4  
5 and consequently is likely to be applicable to other chronic diseases. However,  
6  
7 further investigations are recommended to undertaken, of other possible  
8  
9 intensity/duration constructs of obesity such as considering the effect of BMI above  
10  
11 25 kg/m<sup>2</sup>, and of relationships between obese-years and other chronic diseases and  
12  
13 mortality.  
14  
15  
16  
17  
18  
19  
20  
21

## 22 **CONCLUSION**

23  
24  
25 This study demonstrates the importance of measuring total effect of obesity  
26  
27 combining both the level and the duration of obesity when estimating the risk of  
28  
29 cardiovascular disease associated with obesity. The obese-years construct might  
30  
31 takes into account of the cumulative damage of obesity on body systems, therefore  
32  
33 provides better estimation the risk of CVD than level or the duration of obesity alone.  
34  
35  
36 This approach of examining total effect of obesity is suggested to use in measuring  
37  
38 the burden of obesity related diseases in the community.  
39  
40  
41  
42  
43  
44  
45

## 46 **CONFLICT OF INTEREST:**

47  
48  
49 None declared.  
50  
51  
52  
53  
54  
55  
56  
57  
58  
59  
60

## ACKNOWLEDGMENTS

The authors thank the Framingham Heart Study investigators for granting them permission to use their data set for this study (the Framingham Heart Study is conducted and supported by the National Heart, Lung, and Blood Institute (NHLBI) in collaboration with study investigators). This article was prepared by using a limited-access data set obtained from the NHLBI and does not necessarily reflect the opinions or views of the Framingham Heart Study or the NHLBI.

## CONTRIBUTORS

Author AA developed the analytical techniques of study, performed data analysis, interpretation, drafting of the article and prepared the final version for publication; FAA performed data analysis and interpretation of data; JS, ST, and JB helped review the data analysis and reviewed the article; RW contributed to the study design and reviewing of the article; and AP supervised the implementation of the study, designed the study's analytic strategy, and reviewing of the article.

## SOURCES OF FUNDING

A. A. and F.A.A. were supported by an Indonesian Danone institutional research grant 2012. A. P. and S. T. by the NHMRC grant.

## COMPETING INTERESTS

None

## DATA SHARING STATEMENT

No additional data available

## REFERENCES

1. Hubert HB, Feinleib M, McNamara PM, et al. Obesity as an independent risk factor for cardiovascular disease: A 26-year follow-up of participants in the Framingham Heart Study. *Circulation* 1983;**67**(5):968-77.
2. Morrison JA. Obesity and cardiovascular disease risk factors in Black and White girls: The NHLBI Growth and Health Study. *Am J Public Health* 1992;**82**(12):1613-20.
3. Abdullah A., Stoelwinder A., De Courten M., et al. The Duration of Obesity and the Risk of Cardiovascular Disease. The Conference on Clinical Epidemiology and Evidence-Based Medicine in Global Perspective 27-28 November. Bali, Indonesia, 2010.
4. He J, McGee D, Niu X, et al. Examining the dynamic association of BMI and mortality in the Framingham Heart Study. *Int J Environ Res Public Health* 2009;**6**(12):3115-26.
5. Abdullah A, Stoelwinder J, Shortreed S, et al. The duration of obesity and the risk of type 2 diabetes. *Public Health Nutr* 2011;**14**(1):119-26.
6. Abdullah A, Wolfe R, Stoelwinder JU, et al. The number of years lived with obesity and the risk of all-cause and cause-specific mortality. *Int J Epidemiol* 2011;**40**(4):985-96.
7. Abdullah A, Wolfe R, Mannan H, et al. Epidemiologic merit of obese-years, the combination of degree and duration of obesity. *Am J Epidemiol* 2012;**176**(2):99-107.
8. Leffondre K, Abrahamowicz M, Siemiatycki J, et al. Modeling smoking history: a comparison of different approaches. *Am J Epidemiol* 2002;**156**(9):813-23.
9. Neuner B, Wellmann J, Dasch B, et al. Modeling smoking history: a comparison of different approaches in the MARS study on age-related maculopathy. *Ann Epidemiol* 2007;**17**(8):615-21.
10. Dietrich T, Hoffmann K. A comprehensive index for the modeling of smoking history in periodontal research. *J Dent Res* 2004;**83**(11):859-63.
11. Dawber T. *The Framingham study: the epidemiology of atherosclerotic disease*. Cambridge, Mass.: Harvard University Press, 1980.
12. National Heart L, and Blood Institute, Boston University. The Framingham Heart Study: 50 years of research success. Framingham, MA: Framingham Heart Study; 2012. (<http://www.nhlbi.nih.gov/about/framingham/index.html>). (Accessed November 5, 2012).
13. D'Agostino RB, Sr., Vasan RS, Pencina MJ, et al. General cardiovascular risk profile for use in primary care: the Framingham Heart Study. *Circulation* 2008;**117**(6):743-53.
14. Wilson PWF, D'Agostino RB, Sullivan L, et al. Overweight and obesity as determinants of cardiovascular risk: the Framingham experience. *Arch Intern Med* 2002;**162**(16):1867-72.

15. Parmar MKB, Machin D. *Survival analysis : a practical approach*. Chichester ; New York: J. Wiley, 1995.
16. Fisher LD, Lin DY. Time-Dependent Covariates in The Cox Proportional-Hazards Regression Model. *Annual Review of Public Health* 1999;**20**(1):145-57.
17. Akaike H. A new look at the statistical model identification. *IEEE Transactions on Automatic Control* 1974;**19**(6):716–23.
18. StataCorp LP. *Stata Survival Analysis and Epidemiological Tables Reference Manual Release 10*. College Station, TX: Stata Corporation 2007.
19. Preston SH, Mehta NK, Stokes A. Modeling obesity histories in cohort analyses of health and mortality. *Epidemiology* 2013;**24**(1):158-66.
20. National Center for Health Statistics National *HaNESH*, MD: National Center for Health Statistics; (<http://www.cdc.gov/nchs/nhanes.htm>). (Accessed 3 November 2002). Secondary.
21. CDC. State-Specific Prevalence of Obesity Among Adults — United States. *MMWR* 2008;**57**(36):765-8.
22. Lee JM, Pilli S, Gebremariam A, et al. Getting heavier, younger: trajectories of obesity over the life course. *Int J Obes (Lond)* 2010;**34**(4):614-23.
23. Vazquez G, Duval S, Jacobs DR, Jr., et al. Comparison of Body Mass Index, Waist Circumference, and Waist/Hip Ratio in Predicting Incident Diabetes: A Meta-Analysis. *Epidemiol Rev* 2007;**29**(1):115-28.
24. Lagergren J, Bergström R, Lindgren A, et al. The role of tobacco, snuff and alcohol use in the aetiology of cancer of the oesophagus and gastric cardia. *Int J Cancer* 2000;**85**(3):340-6.
25. Yuan JM, Wang XL, Xiang YB, et al. Non-dietary risk factors for nasopharyngeal carcinoma in Shanghai, China. *Int J Cancer* 2000;**85**(3):364-9.

Table 1: Characteristics of the study population <sup>a</sup>

| Participant Characteristics                                   | No.   | %  | Mean | Range     |
|---------------------------------------------------------------|-------|----|------|-----------|
| Eligible sample                                               | 5,036 |    |      |           |
| Obese participants during study follow-up                     | 1,230 | 24 |      |           |
| Age at baseline (years)                                       |       |    | 44   | 28–62     |
| Female                                                        | 2,799 | 56 |      |           |
| Born in the United States                                     | 4,082 | 81 |      |           |
| Marital status                                                |       |    |      |           |
| Single                                                        | 452   | 9  |      |           |
| Married                                                       | 4,269 | 85 |      |           |
| Widowed, divorced, or separated                               | 315   | 6  |      |           |
| Educational level                                             |       |    |      |           |
| Eighth grade or less                                          | 1,374 | 27 |      |           |
| High school                                                   | 2,306 | 46 |      |           |
| College                                                       | 752   | 15 |      |           |
| Graduate school                                               | 604   | 12 |      |           |
| Health behavior                                               |       |    |      |           |
| Current smoker at baseline                                    | 2,893 | 58 |      |           |
| Ever-smoker during study follow-up period                     | 3,178 | 63 |      |           |
| Physical activity score at examination 4                      |       |    | 32   | 25–83     |
| Alcohol drinking at examination 2, ounces/month <sup>b</sup>  |       |    | 14   | 0–360     |
| Blood pressure at baseline                                    |       |    |      |           |
| Systolic (mm Hg)                                              |       |    | 132  | 85–270    |
| Diastolic (mm Hg)                                             |       |    | 84   | 52–150    |
| Hypertension at baseline                                      | 843   | 17 |      |           |
| Biochemical characteristics at baseline (mg/100 mL)           |       |    |      |           |
| Serum cholesterol                                             |       |    | 226  | 96–586    |
| Blood glucose                                                 |       |    | 80   | 40–197    |
| Body weight characteristics                                   |       |    |      |           |
| Body mass index at baseline (kg/m <sup>2</sup> ) <sup>c</sup> |       |    | 25.5 | 16.2–46.3 |
| Underweight (<18.5)                                           | 67    | 1  |      |           |
| Normal weight (18.5–24.9)                                     | 2,408 | 48 |      |           |
| Overweight (25–29.9)                                          | 1,992 | 40 |      |           |
| Obese (≥30)                                                   | 569   | 11 |      |           |
| Cumulative obesity duration (years) <sup>d</sup>              |       |    | 16   | 2–46      |
| Cumulative obese-years <sup>d</sup>                           |       |    | 63   | 2–556     |
| 1–24.9                                                        | 515   | 42 |      |           |
| 25–49.9                                                       | 232   | 19 |      |           |
| 50–74.9                                                       | 139   | 11 |      |           |
| ≥75                                                           | 344   | 28 |      |           |
| Cardiovascular disease                                        | 2753  |    |      |           |
| Coronary heart disease events                                 | 1890  |    |      |           |
| Heart attack                                                  | 1538  |    |      |           |
| Myocardial infarction                                         | 1104  |    |      |           |
| Coronary insufficiency                                        | 259   |    |      |           |
| Angina pectoris                                               | 945   |    |      |           |
| Cerebrovascular accident                                      | 946   |    |      |           |
| Congestive heart failure                                      | 876   |    |      |           |

<sup>a</sup> Participants were free from existing diabetes, cardiovascular disease, and cancer at baseline.

<sup>b</sup> One ounce ≈ 28.35 g. <sup>c</sup> Body mass index: weight (kg)/height (m)<sup>2</sup>. <sup>d</sup> For those who were obese during study follow-up.

Table 2: Incidence of Cardiovascular Disease (Events/1,000 Person-Years) According to Categories of Cumulative Obese-Years

|                         | <b>Obese-Years</b> | <b>Events</b> | <b>PYFU</b> | <b>Incident Rate</b> |
|-------------------------|--------------------|---------------|-------------|----------------------|
| <b>Total population</b> |                    |               |             |                      |
|                         | 0 year             | 2,177         | 116,681     | 18.66 (17.89-19.46)  |
|                         | 1-25 years         | 276           | 10,846      | 25.45 (22.62-28.63)  |
|                         | 25-50 years        | 124           | 4,509       | 27.50 (23.06-32.80)  |
|                         | 50-75 years        | 78            | 2,365       | 32.98 (26.42-41.18)  |
|                         | >=75years          | 186           | 4,517       | 41.17 (35.66-47.54)  |
| <b>Males</b>            |                    |               |             |                      |
|                         | 0 year             | 1,138         | 46,950      | 24.24 (22.87-25.69)  |
|                         | 1-25 years         | 134           | 4,669       | 28.70 (24.23-34.00)  |
|                         | 25-50 years        | 56            | 1,710       | 32.75 (25.21-42.56)  |
|                         | 50-75 years        | 36            | 720         | 50.02 (36.08-69.34)  |
|                         | >=75years          | 49            | 951         | 51.51 (38.93-68.16)  |
| <b>Females</b>          |                    |               |             |                      |
|                         | 0 year             | 1,039         | 69,731      | 14.90 (14.02-15.83)  |
|                         | 1-25 years         | 142           | 6,177       | 22.99 (19.50-27.10)  |
|                         | 25-50 years        | 68            | 2,799       | 24.30 (19.16-30.81)  |
|                         | 50-75 years        | 42            | 1,645       | 25.53 (18.87-34.54)  |
|                         | >=75years          | 137           | 3,566       | 38.42 (32.49-45.42)  |

PYFU = Persons years of follow-up



Table 3: Risk of Cardiovascular disease According to Obese-Years Category

|                              | Hazard Ratio (95% Confidence Interval) |                  |                  |
|------------------------------|----------------------------------------|------------------|------------------|
|                              | Total population*                      | Males            | Females          |
| <b>Model 1</b>               |                                        |                  |                  |
| 0 obese-years                | 1                                      | 1                | 1                |
| 1-25 obese-years             | 1.28 (1.13-1.45)                       | 1.18 (0.99-1.41) | 1.37 (1.15-1.64) |
| 25-50 obese-years            | 1.31 (1.09-1.57)                       | 1.28 (0.97-1.67) | 1.40 (1.09-1.79) |
| 50-75 obese-years            | 1.50 (1.21-1.85)                       | 1.78 (1.35-2.36) | 1.46 (1.08-1.96) |
| >=75 obese-years             | 1.59 (1.36-1.85)                       | 1.72 (1.33-2.22) | 1.78 (1.48-2.15) |
| Dose-response <i>P</i> value | 0.0001                                 | 0.0001           | 0.0001           |
| <b>Model 2</b>               |                                        |                  |                  |
| 0 obese-years                | 1                                      | 1                | 1                |
| 1-25 obese-years             | 1.26 (1.11-1.43)                       | 1.18 (0.99-1.41) | 1.33 (1.11-1.60) |
| 25-50 obese-years            | 1.32 (1.10-1.59)                       | 1.29 (0.99-1.70) | 1.35 (1.05-1.74) |
| 50-75 obese-years            | 1.55 (1.27-1.91)                       | 1.80 (1.36-2.38) | 1.40 (1.04-1.88) |
| >=75 obese-years             | 1.74 (1.50-2.03)                       | 1.71 (1.32-2.21) | 1.71 (1.42-2.07) |
| Dose-response <i>P</i> value | 0.0001                                 | 0.0001           | 0.0001           |
| <b>Model 3</b>               |                                        |                  |                  |
| 0 obese-years                | 1                                      | 1                | 1                |
| 1-25 obese-years             | 1.31 (1.15-1.48)                       | 1.22 (1.02-1.45) | 1.37 (1.14-1.65) |
| 25-50 obese-years            | 1.37 (1.14-1.65)                       | 1.39 (1.05-1.83) | 1.36 (1.05-1.76) |
| 50-75 obese-years            | 1.62 (1.32-1.99)                       | 1.89 (1.42-2.51) | 1.44 (1.08-1.94) |
| >=75 obese-years             | 1.80 (1.54-2.10)                       | 1.81 (1.39-2.36) | 1.74 (1.44-2.10) |
| Dose-response <i>P</i> value | 0.0001                                 | 0.0001           | 0.0001           |

Model 1 adjusted for age.

Model 2 adjusted for age, marital status, education, country of birth.

Model 3 adjusted for age, marital status, education, country of birth, smoking status, alcohol consumption, physical activity

\* Analyses for total population were adjusted for sex.

Table 4: The Hazard Ratio of Cardiovascular per 10 Obese-Years

| CVD                                            | Hazard Ratio per additional 10 Obese-Years (95% Confidence Interval) |                         |                         |
|------------------------------------------------|----------------------------------------------------------------------|-------------------------|-------------------------|
|                                                | Total population*                                                    | Males                   | Females                 |
| <b>Cardiovascular diseases (all types CVD)</b> |                                                                      |                         |                         |
| Model 1                                        | 1.03 (95% CI 1.02-1.04)                                              | 1.05 (95% CI 1.03-1.07) | 1.03 (95% CI 1.02-1.04) |
| Model 2                                        | 1.03 (95% CI 1.02-1.04)                                              | 1.05 (95% CI 1.03-1.07) | 1.03 (95% CI 1.02-1.04) |
| Model 3                                        | 1.04 (95% CI 1.03-1.05)                                              | 1.06 (95% CI 1.04-1.08) | 1.03 (95% CI 1.02-1.04) |
| <b>Hard Cardiovascular diseases (Hard CVD)</b> |                                                                      |                         |                         |
| Model 1                                        | 1.03 (95% CI 1.02-1.04)                                              | 1.06 (95% CI 1.04-1.08) | 1.03 (95% CI 1.02-1.05) |
| Model 2                                        | 1.04 (95% CI 1.03-1.05)                                              | 1.06 (95% CI 1.04-1.08) | 1.03 (95% CI 1.02-1.04) |
| Model 3                                        | 1.04 (95% CI 1.03-1.05)                                              | 1.06 (95% CI 1.04-1.08) | 1.03 (95% CI 1.02-1.04) |
| <b>Coronary heart disease (CHD)</b>            |                                                                      |                         |                         |
| Model 1                                        | 1.02 (95% CI 1.01-1.03)                                              | 1.03 (95% CI 1.01-1.06) | 1.03 (95% CI 1.02-1.04) |
| Model 2                                        | 1.03 (95% CI 1.02-1.04)                                              | 1.03 (95% CI 1.01-1.06) | 1.03 (95% CI 1.02-1.04) |
| Model 3                                        | 1.03 (95% CI 1.02-1.04)                                              | 1.04 (95% CI 1.02-1.06) | 1.03 (95% CI 1.02-1.04) |
| <b>Cerebrovascular accident (CVA)</b>          |                                                                      |                         |                         |
| Model 1                                        | 1.03 (95% CI 1.02-1.04)                                              | 1.06 (95% CI 1.04-1.09) | 1.03 (95% CI 1.01-1.04) |
| Model 2                                        | 1.03 (95% CI 1.02-1.04)                                              | 1.06 (95% CI 1.04-1.09) | 1.02 (95% CI 1.01-1.04) |
| Model 3                                        | 1.03 (95% CI 1.02-1.04)                                              | 1.06 (95% CI 1.04-1.09) | 1.02 (95% CI 1.01-1.04) |
| <b>Congestive heart failure (CHF)</b>          |                                                                      |                         |                         |
| Model 1                                        | 1.05 (95% CI 1.03-1.06)                                              | 1.06 (95% CI 1.04-1.09) | 1.05 (95% CI 1.03-1.06) |
| Model 2                                        | 1.05 (95% CI 1.04-1.06)                                              | 1.06 (95% CI 1.04-1.09) | 1.04 (95% CI 1.03-1.06) |
| Model 3                                        | 1.05 (95% CI 1.04-1.06)                                              | 1.06 (95% CI 1.04-1.09) | 1.04 (95% CI 1.03-1.06) |

Model 1 adjusted for age.

Model 2 adjusted for age, marital status, education, country of birth.

Model 3 adjusted for age, marital status, education, country of birth, smoking status, alcohol consumption, physical activity

\* For total population also adjusted for sex

Table 5: Comparison of the Obese-years construct, Body Mass Index and Obesity Duration as predictors of the Risk of CVD

| Constructs                                     | Akaike Information Criterion (AIC) |       |         |
|------------------------------------------------|------------------------------------|-------|---------|
|                                                | Total population                   | Males | Females |
| <b>Cardiovascular diseases (all types CVD)</b> |                                    |       |         |
| Construct 1: Level of BMI                      | 43390                              | 19227 | 20307   |
| Construct 2: Duration of obesity               | 43379                              | 19221 | 20306   |
| Construct 3: Obese-Years                       | 43368                              | 19209 | 20294   |
| <b>Hard Cardiovascular diseases (Hard CVD)</b> |                                    |       |         |
| Construct 1: Level of BMI                      | 34069                              | 15102 | 15976   |
| Construct 2: Duration of obesity               | 34065                              | 15099 | 15968   |
| Construct 3: Obese-Years                       | 34050                              | 15096 | 15955   |
| <b>Coronary heart disease (CHD)</b>            |                                    |       |         |
| Construct 1: Level of BMI                      | 29038                              | 14355 | 12156   |
| Construct 2: Duration of obesity               | 29039                              | 14354 | 12162   |
| Construct 3: Obese-Years                       | 29028                              | 14351 | 12152   |
| <b>Cerebrovascular accident (CVA)</b>          |                                    |       |         |
| Construct 1: Level of BMI                      | 13575                              | 5211  | 7147    |
| Construct 2: Duration of obesity               | 13577                              | 5208  | 7141    |
| Construct 3: Obese-Years                       | 13573                              | 5208  | 7136    |
| <b>Congestive health failure (CHF)</b>         |                                    |       |         |
| Construct 1: Level of BMI                      | 13141                              | 5275  | 6667    |
| Construct 2: Duration of obesity               | 13122                              | 5263  | 6663    |
| Construct 3: Obese-Years                       | 13104                              | 5255  | 6649    |

Each construct was split into 11 categories; 1 represents "not obese" and 2-11 represent deciles of obesity exposure (intensity, duration and obese-years)

Each model adjusted for sex, age, marital status, education, smoking, alcohol consumption, and physical activity.

# BMJ Open

## Estimating the risk of cardiovascular disease using an obese-years metric

|                                 |                                                                                                                                                                                                                                                                                                                                                                                                                                                                                                                                                                                                                                                                                                                                                    |
|---------------------------------|----------------------------------------------------------------------------------------------------------------------------------------------------------------------------------------------------------------------------------------------------------------------------------------------------------------------------------------------------------------------------------------------------------------------------------------------------------------------------------------------------------------------------------------------------------------------------------------------------------------------------------------------------------------------------------------------------------------------------------------------------|
| Journal:                        | <i>BMJ Open</i>                                                                                                                                                                                                                                                                                                                                                                                                                                                                                                                                                                                                                                                                                                                                    |
| Manuscript ID:                  | bmjopen-2014-005629.R1                                                                                                                                                                                                                                                                                                                                                                                                                                                                                                                                                                                                                                                                                                                             |
| Article Type:                   | Research                                                                                                                                                                                                                                                                                                                                                                                                                                                                                                                                                                                                                                                                                                                                           |
| Date Submitted by the Author:   | 22-Aug-2014                                                                                                                                                                                                                                                                                                                                                                                                                                                                                                                                                                                                                                                                                                                                        |
| Complete List of Authors:       | Abdullah, Asnawi; Faculty of Public Health, University Muhammadiyah Aceh, Biostatistics and Population Health; Monash University, Department Epidemiology and Preventive Medicine, Amin, Fauzi; Faculty of Public Health, University Muhammadiyah Aceh, Public Health Nutrition<br>Stoelwinder, Johannes; Monash University, Epidemiology and Preventive Medicine<br>Tanamas, Stephanie; Baker IDI Heart and Diabetes Institute, Wolf, Rory; Monash University, Epidemiology and Preventive Medicine<br>Barendregt, Jan; University of Queensland, School of Population Health<br>Peeters, Anna; Baker IDI Heart and Diabetes Institute, Obesity and Population Health; Baker IDI Heart and Diabetes Institute, Clinical Diabetes and Epidemiology |
| <b>Primary Subject Heading</b>: | Epidemiology                                                                                                                                                                                                                                                                                                                                                                                                                                                                                                                                                                                                                                                                                                                                       |
| Secondary Subject Heading:      | Nutrition and metabolism, Public health, Cardiovascular medicine                                                                                                                                                                                                                                                                                                                                                                                                                                                                                                                                                                                                                                                                                   |
| Keywords:                       | EPIDEMIOLOGY, PUBLIC HEALTH, VASCULAR MEDICINE, Risk management < HEALTH SERVICES ADMINISTRATION & MANAGEMENT, Vascular medicine < INTERNAL MEDICINE, NUTRITION & DIETETICS                                                                                                                                                                                                                                                                                                                                                                                                                                                                                                                                                                        |
|                                 |                                                                                                                                                                                                                                                                                                                                                                                                                                                                                                                                                                                                                                                                                                                                                    |

SCHOLARONE™  
Manuscripts

**Title:**

Estimating the risk of cardiovascular disease using an obese-years metric

**Running title:**

Obese-years and cardiovascular disease

**Authors:**

Asnawi Abdullah, PhD<sup>1,3</sup>

Fauzi Ali Amin, MPH<sup>2</sup>

Johannes Stoelwinder, MD<sup>3</sup>

Stephanie K Tanamas, PhD<sup>4</sup>

Rory Wolfe, PhD<sup>3</sup>

Jan Barendregt, PhD<sup>5</sup>

Anna Peeters, PhD<sup>3,4</sup>

**Authors Address:**

<sup>1</sup> Department of Biostatistics and Population Health. Faculty of Public Health, University Muhammadiyah Aceh, Indonesia;

<sup>2</sup> Department of Public Health Nutrition. Faculty of Public Health, University Muhammadiyah Aceh, Indonesia;

<sup>3</sup> Department of Epidemiology and Preventive Medicine, School of Public Health and Preventive Medicine, Monash University, Australia;

<sup>4</sup> Baker IDI Heart and Diabetes Institute, Australia;

<sup>5</sup> School of Population Health, University Queensland, Australia.

**Correspondence to:**

Asnawi Abdullah, Department of Biostatistics and Population Health, Faculty of Public Health, University of Muhammadiyah Aceh, Jln. Leung Bata, Batoh, Banda Aceh, Indonesia, 23245. Phone +6265131054, Fax. +6265131053, Email: Asnawi.Abdullah@fkm.unmuha.ac.id

**Word count:**

*Text = 3325 words; Abstract = 294 words; 28 references, Tables 6*

**ABSTRACT:**

**Objective:** To examine the association between obese-years and the risk of cardiovascular disease (CVD).

**Study design:** Prospective cohort study

**Setting:** Boston, USA

**Participants:** 5036 participants of the Framingham Heart Study were examined.

**Methods:** Obese-years was calculated by multiplying for each participant the number of BMI units above 29 kg/m<sup>2</sup> by the number of years lived at that BMI during approximately 50 years of follow-up. The association between obese-years and CVD was analyzed using time-dependent Cox regression adjusted for potential confounders and compared with other models using the Akaike Information Criterion (AIC). The lowest AIC indicated better fit.

**Primary outcome:** Cardiovascular disease.

**The Results:** The median cumulative obese-years was 24 (range, 2–556 obese-years). During 138,918 person-years of follow-up, 2753 (55%) participants were diagnosed with CVD. The incidence rates and adjusted hazards ratios (AHR) for CVD increased with an increase in the number of obese-years. AHR for the categories 1–24.9, 25–49.9, 50–74.9, and ≥75 obese-years were respectively 1.31 (95% CI: 1.15–1.48), 1.37 (95% CI: 1.14–1.65), 1.62 (95% CI: 1.32–1.99), and 1.80 (95% CI: 1.54–2.10) compared with those who were never obese (i.e. had zero obese-years). The effect of obese-years was stronger in males than females. For every 10 unit increase in obese-years, the AHR of CVD increased by 6% (95% CI 4% to 8%) for males and 3% (95% CI 2% to 4%) for females. The AIC was lowest for the model containing obese-years compared with models containing either the level of BMI or the duration of obesity alone.

**Conclusions:** This study demonstrates that obese-years metric conceptually captures the cumulative damage of obesity on body systems, and is found to provide slightly more precise estimation of the risk of CVD than level or the duration of obesity alone.

**Key Words:** *Obesity, BMI, the duration of obesity, obese-years, risk factor, cardiovascular disease*

1  
2  
3  
4  
5  
6  
7  
8  
9  
10  
11  
12  
13  
14  
15  
16  
17  
18  
19  
20  
21  
22  
23  
24  
25  
26  
27  
28  
29  
30  
31  
32  
33  
34  
35  
36  
37  
38  
39  
40  
41  
42  
43  
44  
45  
46  
47  
48  
49  
50  
51  
52  
53  
54  
55  
56  
57  
58  
59  
60

### **Strengths of this study**

- The obese-years metric combines the number of years lived with obesity and the level of BMI to examine the total effect of obesity.
- The Framingham Heart Study is a long term prospective cohort study with approximately 50 years of follow-up, and biennial measurements of body weight, covariates and health outcomes.
- By using time-dependent Cox proportional hazards regression, the analysis takes into account changes in covariates during study follow-up and adjusts for a large number of potential confounding variables.

### **Limitations of this study**

- The obese-years metric was developed based on the measurement of BMI. It is unclear whether using anthropometric measures other than BMI would produce different results.
- Data used for this study was from a relatively old cohort study, which began in 1948.

## Background

The association between obesity and cardiovascular disease (CVD) is well known<sup>1 2</sup>. However, these findings are generally based on analysing only the level of BMI in relation to CVD. More recently, studies have demonstrated the importance of taking into account the potential cumulative effect of the duration of obesity, rather than the simple assessment of obesity at a single point in time (e.g. at baseline). Duration of obesity has been shown to be a risk factor for CVD<sup>3</sup>, type-2 diabetes<sup>4</sup> and mortality<sup>5</sup>, independent of body mass index (BMI). Nevertheless, analyses based on either level of BMI alone or duration lived with obesity alone, may not reflect the total effect of obesity and may underestimate the risk of CVD attributable to obesity. We have recently demonstrated the additional benefit of combining the level of obesity with the number of years lived with obesity into a single measure, finding that an obese-years metric is a better predictor of the risk of type-2 diabetes than level of BMI or duration of obesity alone<sup>7</sup>.

The use of the obese-years metric to estimate the risk of CVD has not been investigated yet. We hypothesized that the obese-years metric is likely a similar independent risk factor for CVD and would provide an improved estimation of the risk of future CVD. This study aimed to examine the association between



1  
2  
3 obese-years and risk of CVD and to examine whether the obese-years metric is  
4  
5 a better predictor for risk of CVD than current BMI or duration of obesity alone.  
6  
7  
8 We investigated these objectives using the Framingham Heart Study (FHS), a  
9  
10 long term prospective cohort study where body weight, health outcomes and  
11  
12 other covariates were measured biennially for almost 50 years<sup>11</sup>.  
13  
14  
15

## 16 17 18 19 **METHODS**

### 20 21 22 **Data source**

23  
24 We used data from the Framingham Heart Study (FHS)<sup>12</sup>. In this prospective  
25  
26 cohort study, 5,209 participants (aged 28–62 years at the time of enrolment)  
27  
28 attended biennial examinations for approximately 50 years beginning from  
29  
30 1948. For the purpose of this study, only participants who were free from CVD  
31  
32 (any type), cancer and type-2 diabetes at baseline were included in the analysis  
33  
34 ( $n = 5,036$ ).  
35  
36  
37  
38  
39  
40  
41  
42  
43

### 44 45 **Variables: measurement, missing and imputation**

46  
47 Most variables in the FHS were measured regularly at the two-yearly  
48  
49 examinations, including body weight, height, demographic variables, health  
50  
51 behaviors, and health outcomes (including cardiovascular disease)<sup>11</sup>. Some  
52  
53 values are missing by design where variables were not collected at every  
54  
55  
56  
57  
58  
59  
60

1  
2  
3 examination. For example current smoking status was not recorded at four  
4  
5 examinations (2, 3, 6 and 17), cholesterol was not measured at seven  
6  
7 examinations (11, 12, 17-20 and 22), alcohol consumption was measured only  
8  
9 at eight examinations (2, 4, 7, 19, 20–23), and physical activity was measured  
10  
11 only at four examinations (4, 11, 12, and 19). In this circumstance, the most  
12  
13 contemporary measured value of the variable was used in place of missing  
14  
15 values at the examination times when the variable was not measured. Another  
16  
17 missing data circumstance was when missing values occurred intermittently  
18  
19 during study follow-up; for example body weight and hence BMI. In this case  
20  
21 missing values for BMI were imputed with a conditional mean estimated by a  
22  
23 multiple linear regression model using age at prior exam, sex and several  
24  
25 transformations of the previously measured BMI (BMI, log BMI, BMI squared  
26  
27 and BMI as a categorical variable). Methods of measurement of these variables  
28  
29 have been described in detail elsewhere<sup>47</sup>.

### 44 **The level of obesity, duration and obese-years measurement**

45  
46 A participant was considered obese at a given examination if their BMI was  
47  
48 greater than or equal to 30 kg/m<sup>2</sup>. The level of obesity was defined as follows:  
49  
50 (1) if BMI < 30 kg/m<sup>2</sup>, the level was zero; and (2) if BMI ≥ 30 kg/m<sup>2</sup>, the level  
51  
52  
53  
54  
55  
56  
57  
58  
59  
60

1  
2  
3 was BMI minus 29 kg/m<sup>2</sup>. For example, if BMI was 35 kg/m<sup>2</sup>, the level was 6 (35  
4  
5 – 29) obese units.  
6  
7  
8  
9

10  
11  
12 The duration of obesity followed a similar definition to that described  
13 previously<sup>4</sup>. The duration of obesity was calculated for those individuals with at  
14  
15 least two consecutive examinations with occurrence of obesity (which is  
16  
17 interpreted as indicating at least two years of being continuously obese). The  
18  
19 requirement for two consecutive examinations with obesity was to avoid the  
20  
21 potential misclassification of body weight, either due to measurement error or  
22  
23 fluctuations between the borderline of the 'overweight' category or the 'obese'  
24  
25 category. For those individuals without two consecutive obesity occurrences,  
26  
27 duration was considered to be zero at all exams. For those individuals with two  
28  
29 consecutive obesity occurrences, the beginning of their obesity duration  
30  
31 interval was defined as the date of the first of these two examinations and from  
32  
33 that time, the individual was considered to be continuously obese until either  
34  
35 the first of two consecutive non-obese examinations, or death, or the end of  
36  
37 follow-up at examination 24. Individuals could have multiple periods of obesity  
38  
39 duration during follow-up.  
40  
41  
42  
43  
44  
45  
46  
47  
48  
49  
50  
51  
52  
53  
54  
55  
56  
57  
58  
59  
60

1  
2  
3 The level of obesity and the duration of obesity were combined as a single  
4  
5 variable called obese-years. Obese-years was calculated at each examination as  
6  
7 the defined level of obesity (in "obese units") multiplied by the defined  
8  
9 duration of obesity (in years). Then the cumulative total of obese-years for  
10  
11 each examination was calculated as a sum of all obese-year "exposures" up to  
12  
13 and including that examination.  
14  
15  
16  
17  
18  
19

20  
21 Table 1 illustrates the calculation of obese-years for a single individual. This  
22  
23 participant first had a measurement of obesity at examination 2 and was  
24  
25 assigned obesity duration of zero at this examination. At examination 3, this  
26  
27 participant was assumed to have lived with obesity for 2 years (the interval  
28  
29 between examination 2 and examination 3) with a degree of obesity of 1  
30  
31 kg/m<sup>2</sup>. This approach assumes that an individual's BMI is carried forward from  
32  
33 a given examination (i.e., examination 2) and does not change until a different  
34  
35 BMI value at a subsequent examination (i.e., examination 3). The number of  
36  
37 obese-years at examination 3 was therefore 2 obese-years (1 BMI unit X 2  
38  
39 years in the preceding interval). From examination 3 to examination 4 (a 3 year  
40  
41 interval), the participant was still obese with a degree of obesity of 3 kg/m<sup>2</sup>  
42  
43 (BMI 32 kg/m<sup>2</sup>). At examination 4, the number of obese-years was 9 (3BMI unit  
44  
45 X 3 years) and the cumulative obese-years at this examination was 11 obese-  
46  
47 years (2 plus 9).  
48  
49  
50  
51  
52  
53  
54  
55  
56  
57  
58  
59  
60

1  
2  
3  
4  
5 This method implies that individuals accumulating 50 obese-years, for example,  
6  
7  
8 could have reached this quantity either by having been obese with BMI of 30  
9  
10  
11 kg/m<sup>2</sup> for approximately 50 years or by having been obese with BMI of 34  
12  
13 kg/m<sup>2</sup> for approximately 10 years or, indeed, many other combinations.  
14  
15

### 16 17 18 19 **Measurement of the outcome and time to event**

20  
21 The main outcome of interest in this study was CVD incidence (the first event  
22  
23 of any type of CVD; defined as a composite of coronary heart disease (CHD),  
24  
25 cerebrovascular accident (CVA), peripheral artery disease, and congestive heart  
26  
27 failure (CHF)<sup>13</sup>. Additional outcomes were individual types of CVD: hard CVD,  
28  
29 CHD, CVA, and CHF. Hard CVD was defined as a composite of hard CHD  
30  
31 (coronary death, myocardial infarction), stroke (fatal and nonfatal), peripheral  
32  
33 artery disease and heart failure. In the FHS, the criteria for each cardiovascular  
34  
35 outcome during follow-up were standardized<sup>14</sup> and a panel of Framingham  
36  
37 investigators made an adjudication regarding diagnosis. CHD includes the  
38  
39 diagnoses of (1) angina pectoris, evidenced by a typical history of chest pain  
40  
41 on a physician-administered questionnaire; (2) myocardial infarction,  
42  
43 determined by specified electrocardiographic changes, diagnostic elevation of  
44  
45 serum enzymes with prolonged ischemic chest pain, or on autopsy; (3)  
46  
47 coronary insufficiency, defined as prolonged ischemic chest pain accompanied  
48  
49  
50  
51  
52  
53  
54  
55  
56  
57  
58  
59  
60

1  
2  
3 by transient ischemic abnormalities on ECG; and (4) sudden (in less than 1  
4  
5 hour) or non-sudden coronary death. CHF was indicated when at least two  
6  
7 major or one major and two minor diagnostic conditions existed concurrently  
8  
9 upon examination.  
10  
11  
12  
13  
14  
15  
16  
17

18 Time to event was measured as the time from cohort entry until the date a  
19  
20 participant was diagnosed as having CVD. Individuals who died or reached the  
21  
22 end of the follow-up (examination 24) before developing CVD were censored  
23  
24 at date of death or examination 24, respectively.  
25  
26  
27  
28  
29  
30  
31

### 32 **Data analysis**

33  
34 To model the relationship between the various measures of obesity and risk of  
35  
36 CVD in a dynamic survival model way<sup>6</sup> an extended Cox regression model  
37  
38 involving time-dependent (time-varying) variables<sup>15-18</sup> was used. The  
39  
40 demographic and health behavior variables included in the analysis were age,  
41  
42 sex and country of birth at baseline, and the time-varying values of education  
43  
44 level, marital status, smoking status, alcohol consumption (ounces/month), and  
45  
46 physical activity. The regression coefficients from these models were  
47  
48 exponentiated and interpreted as hazard ratios noting that care is required  
49  
50  
51  
52  
53  
54  
55  
56  
57  
58  
59  
60

1  
2  
3 with this interpretation<sup>17</sup> since the model does not technically define  
4  
5  
6 proportional hazards in the presence of time-varying variables.  
7  
8  
9

10  
11  
12 The obese-years metric was analysed both as a continuous and as a categorical  
13  
14 variable using the same categories as using in the previous study<sup>7</sup> for  
15  
16 comparison purposes. For analyses of continuous obese-years, hazard ratios  
17  
18 are presented per 10 obese-years. For analyses of categorical obese-years,  
19  
20 participants who were never obese during study follow-up (zero obese-years)  
21  
22 were assigned as a comparator (reference category) and the level of obese-  
23  
24 years was grouped into short, medium long and extensive periods representing  
25  
26 1-24.9, 25-49.9, 50-74.9 and  $\geq 75$  obese-years. Hazard ratios are presented,  
27  
28 both as crude hazard ratios and as multivariate-adjusted hazard ratios for both  
29  
30 continuous and categorical versions of obese-years. Three models were used  
31  
32 to examine the hazard ratios with the addition of different confounding  
33  
34 variables. Model 1 was adjusted for age. Model 2 was adjusted for age, sex,  
35  
36 marital status, educational level and country of birth. Model 3 included  
37  
38 adjustment for all variables in model 2 plus the health behavior variables of  
39  
40 smoking status, alcohol consumption and physical activity. The analyses were  
41  
42 stratified by sex and a test for interaction between sex/smoking status and  
43  
44 obese-years was performed.  
45  
46  
47  
48  
49  
50  
51  
52  
53  
54  
55  
56  
57  
58  
59  
60

1  
2  
3  
4  
5  
6 To compare the relative predictive values of obesity level, obesity duration and  
7  
8 the obese-years metric, each of these three variables were divided into an  
9  
10 equal number of categories. One group was created for those who were never  
11  
12 obese (BMI less than 30 kg/m<sup>2</sup>) as a reference. For those with obesity, ten  
13  
14 deciles were used to create categories. The goodness of fit of the models  
15  
16 incorporating each of the three variables was compared using Akaike's  
17  
18 information criterion (AIC), computed as  $-2(\log\text{-likelihood}) + 2$  (number of  
19  
20 estimated parameters); with a lower AIC indicating a better fit<sup>19</sup>. All analyses  
21  
22 were performed using the Stata statistical software package version 11.0  
23  
24 (StataCorp, College Station, TX, USA)<sup>20</sup>.

### 35 36 **Sensitivity analyses**

37  
38 A sensitivity analysis was performed to examine whether the associations were  
39  
40 influenced by the imputation method for missing BMI. The analysis was  
41  
42 repeated by including only participants with no missing values of BMI at any  
43  
44 examinations. The effect of the duration of obesity prior to baseline was tested  
45  
46 by excluding those who were obese at baseline (n = 576).  
47  
48  
49  
50  
51  
52  
53  
54  
55  
56  
57  
58  
59  
60



## RESULTS

### Characteristics of the Participants

Of the 5,036 eligible study participants, 1230 (24%) participants were obese for at least 2 consecutive examinations during the study follow-up. For those who were ever obese during the study, the median cumulative duration of obesity was approximately 12 years (range, 2–46 years), and the median cumulative obese-years was 24 (range, 2–556 obese-years). 2753 (55%) participants were diagnosed with cardiovascular disease over approximately 138,918 person-years of follow-up (Table 2).

### Incidence and Hazards Ratios for Cardiovascular Disease

The incidence rates and adjusted hazards ratios for CVD increased with an increase in the number of obese-years (Table 3 and Table 4). In Model 3 for males and females combined, the adjusted hazard ratios for the categories 1–24.9, 25–49.9, 50–74.9, and  $\geq 75$  obese-years were respectively 1.31 (95% CI: 1.15–1.48), 1.37 (95% CI: 1.14–1.65), 1.62 (95% CI: 1.32–1.99), and 1.80 (95% CI: 1.54–2.10) compared with those who were never obese (i.e. had zero obese-years). For obese-years as a continuous variable, with every 10 unit increase in obese-years the adjusted hazard ratio for CVD was estimated to increase by

1  
2  
3 4% (95% CI 3% - 5%) (Table 5). There were no significant interactions between  
4  
5 obese-year categories with sex or smoking status. There was evidence of an  
6  
7 interaction between obese-years as a continuous variable and sex ( $P$  value =  
8  
9 0.01). The effect of obese-years was stronger in males than in females.  
10  
11  
12

### 13 14 15 16 17 **Comparing Obesity Metrics and Akaike's Information Criterion (AIC),**

18  
19 Table 6 demonstrates the risk of CVD for each of the three different constructs  
20  
21 for obesity: level of obesity (based on BMI), duration of obesity, and the obese-  
22  
23 years metric. Each construct was analysed in a separate model as an additive  
24  
25 effect and the strength of association was compared using the Akaike  
26  
27 Information Criterion (AIC). In all outcomes, the AIC was lowest in the model  
28  
29 using the obese-years metric compared with the other models for the total  
30  
31 population and by sex.  
32  
33  
34  
35  
36  
37  
38  
39  
40

### 41 **Sensitivity analysis**

42  
43  
44 The sensitivity analyses showed that the association between obese-years and  
45  
46 risk of CVD was similar in a complete case analysis and the analysis using  
47  
48 imputed missing values for BMI. Exclusion of participants who were obese at  
49  
50 baseline showed only a slightly lower adjusted hazard ratio: 1.03 (95% CI: 1.01-  
51  
52 1.05)  
53  
54  
55  
56  
57  
58  
59  
60

## DISCUSSION

This study found that measuring the total effect of obesity by combining the level and the duration of obesity into a single metric of obese-years is a stronger predictor for the risk of CVD compared to using duration of obesity or level of obesity alone. A clear dose-response relationship between obese-years and risk of CVD was observed. A stronger effect was found in males than in females

Although the hazard ratios were very similar between the three different constructs, and it is not possible to perform a statistical comparison of discrimination between the models due to the fact that they are non-nested, the AIC does indicate that combining the level and duration of obesity into a single construct of obese-years provides greater discriminative power than a model with level of obesity or obesity duration alone. However the disparity in AIC between the competing models was not as great as was observed with diabetes as the outcome of interest<sup>7</sup> and so it is unclear the extent to which this finding has important implications for future studies of the total health impact associated with obesity and whether future studies should take into

1  
2  
3 account both the impact of obesity level and changes in the duration of  
4  
5 obesity.  
6  
7  
8  
9

10  
11  
12 There are different ways to operationalize the impact of excess weight over  
13 time. A recent systematic review identified at least four models: an additive  
14 model, a duration-of-obesity model, an additive-weight-change model, and an  
15 interactive model<sup>21</sup>. In addition to these models, findings using the obese-year  
16 model suggest that analyzing the combined effect of the duration and the level  
17 of obesity as a predictor of CVD is worthwhile. Such approaches add  
18 information over and above simply the level of excess weight or length of time  
19 with obesity. As has been argued previously<sup>7</sup> other potential addition to this  
20 analysis is examining the excess body weight as higher than 25 kg/m<sup>2</sup>.  
21  
22  
23  
24  
25  
26  
27  
28  
29  
30  
31  
32  
33  
34  
35  
36  
37  
38  
39

40 The findings in this study were derived from analysis of a long term  
41 prospective cohort study with biennial measurements of body weight,  
42 covariates and health outcomes which enabled us to analyze change in level of  
43 obesity and duration of obesity over a long period. The analysis takes into  
44 account changes in covariates, such as smoking status, alcohol consumption  
45 and physical activity and adjusts for a large number of potential confounding  
46 variables. However, some potential confounders, such as diet, were not  
47  
48  
49  
50  
51  
52  
53  
54  
55  
56  
57  
58  
59  
60

1  
2  
3 collected consistently in the Framingham Heart Study and therefore have not  
4  
5 been adjusted for in our analysis.  
6  
7  
8  
9

10  
11  
12 As has been described elsewhere<sup>7</sup>, the limitation of this analysis might relate to  
13 the population being a relatively old cohort study, the Framingham Heart  
14 Study that began in 1948, and the prevalence rates of obesity were relatively  
15 low at that time (in the 1950s was below 10%)<sup>22</sup>. It could be argued that the  
16 results of this study might not reflect contemporary populations, where the  
17 prevalence of obesity is markedly higher than 50 years ago. In 2008, the  
18 prevalence of obesity among adults in the United States was more than 30%<sup>23</sup>  
19  
20  
21  
22  
23  
24  
25  
26  
27  
28  
29  
30  
31  
32  
33  
34  
35  
36  
37  
38  
39  
40  
41  
42  
43  
44  
45  
46  
47  
48  
49  
50  
51  
52  
53  
54  
55  
56  
57  
58  
59  
60

24. Moreover, the contemporary obesity epidemic is also characterized by a  
much earlier onset of obesity, which could result in even longer exposure by  
the time today's obese generation of children reach the age of our studied  
cohort. In our study, the average age at onset of obesity was approximately 50  
years, and the average number of years lived with obesity was approximately  
13 years but in today's society, the average age at onset of obesity is likely to  
be more than 10 years earlier than in previous decades<sup>25</sup>. Nevertheless, our  
results indicate that the obese-years metric is still valid and may provide more  
precision in predicting the risk of CVD than level of BMI or duration of obesity  
alone.

1  
2  
3  
4  
5  
6 The obese-years metric in this study was based on the measurement of BMI. It  
7  
8 is unclear whether using anthropometric measures other than BMI would  
9  
10 produce different results. Although a recent meta-analysis study has showed  
11  
12 that BMI, waist circumference (WC), and the waist/hip ratio (WHR) each  
13  
14 estimate a similar risk, particularly for type-2 diabetes<sup>26</sup>; it is still worthwhile  
15  
16 explore the relationship between obese-years and risk of CVD using WC or  
17  
18  
19  
20  
21 WHR.  
22  
23  
24  
25  
26  
27

28 As discussed in our previous study<sup>7</sup>, the obese-years metric was developed  
29  
30 based on the assumption that level and duration of obesity have a similar  
31  
32 impact, an assumption that has been used for the concept of pack-years in  
33  
34 smoking studies. In some smoking studies, it was highlighted that for certain  
35  
36 health outcomes, the effect of the duration was more important than  
37  
38 intensity<sup>27</sup>, while in others, duration was not significant after adjustment for  
39  
40 intensity<sup>28</sup>. As we have previously discussed, the notion that obese-years is only  
41  
42  
43  
44 "switched on" when BMI reaches 30 kg/m<sup>2</sup> is crude<sup>7</sup>, however it is an important  
45  
46  
47  
48 construct to consider whether the combination of level and duration is relevant  
49  
50 for a particular outcome. In addition, although obese-years does find a parallel  
51  
52 in pack-years for smoking, which is a construct that ignores any effects of  
53  
54  
55  
56  
57  
58  
59  
60

1  
2  
3 passive smoking, the nature of cumulative exposure in obesity is not as  
4  
5 straightforward as in smoking.  
6  
7  
8  
9

10  
11  
12 These findings demonstrate that it is important to consider not only the level  
13  
14 of obesity but also the duration of obesity and their combination when  
15  
16 examining the association between obesity and the risk of chronic disease. This  
17  
18 effect is likely to be because the obese-years metric takes into account the  
19  
20 cumulative damage of obesity to body systems, and consequently is likely to  
21  
22 be applicable to other chronic diseases. However, further investigations are  
23  
24 recommended to be undertaken, of other possible level/duration constructs of  
25  
26 obesity such as considering the effect of BMI above 25 kg/m<sup>2</sup>, and of  
27  
28 relationships between obese-years and other chronic diseases and mortality.  
29  
30  
31  
32  
33  
34  
35  
36  
37  
38

39 We acknowledge that a major challenge in examining the obese-years metric is  
40  
41 to have information on both the degree of obesity and the duration of obesity.  
42  
43 Few cohort studies measure obesity and health outcomes regularly as in the  
44  
45 FHS. However, we believe there would be value in more detailed assessment of  
46  
47 height and weight on multiple repeated occasions in future cohort studies and  
48  
49 to identify other more readily available proxies of duration, such as peak  
50  
51  
52  
53  
54  
55  
56  
57  
58  
59  
60

1  
2  
3 weight or age of onset of obesity and to test to what extent those variables are  
4  
5 equivalent to the obese-year metric.  
6  
7  
8  
9

10  
11 It is important that these results inform future epidemiological analyses,  
12  
13 suggesting that the risk of obesity on some health outcomes is being  
14  
15 underestimated if duration is not being taken into account. This has  
16  
17 consequent implications for underestimation of obesity-related burden of  
18  
19 disease modelling and cost-effectiveness analyses. In addition, the results  
20  
21 inform public health policy, demonstrating further rationale for preventing  
22  
23 weight gain and delaying the onset of obesity.  
24  
25  
26  
27  
28  
29  
30  
31  
32

### 33 **CONCLUSION**

34  
35  
36  
37 This study demonstrates that the risk of CVD associated with obesity is derived  
38  
39 both from the level of obesity attained and also the length of time lived with  
40  
41 obesity. The obese-years metric conceptually captures the cumulative damage  
42  
43 of obesity on body systems, and is found to provide slightly more precise  
44  
45 estimation of the risk of CVD than level or the duration of obesity alone.  
46  
47  
48  
49  
50  
51  
52  
53  
54  
55  
56  
57  
58  
59  
60



**CONFLICT OF INTEREST:**

None declared.

**ACKNOWLEDGMENTS**

The authors thank the Framingham Heart Study investigators for granting them permission to use their data set for this study (the Framingham Heart Study is conducted and supported by the National Heart, Lung, and Blood Institute (NHLBI) in collaboration with study investigators). This article was prepared by using a limited-access data set obtained from the NHLBI and does not necessarily reflect the opinions or views of the Framingham Heart Study or the NHLBI.

**CONTRIBUTORS**

Author AA developed the analytical techniques of study, performed data analysis, interpretation, drafting of the article and prepared the final version for publication; FAA performed data analysis and interpretation of data; JS, ST, and JB helped review the data analysis and reviewed the article; RW contributed to the study design and reviewing of the article; and AP supervised the implementation of the study, designed the study's analytic strategy, and reviewing of the article

**SOURCES OF FUNDING**

1  
2  
3 A. A. and F.A.A. were supported by an Indonesian Danone institutional research  
4  
5 grant 2012. A. P. and S. T. by an NHMRC project grant.  
6  
7

8 **DATA SHARING STATEMENT**  
9

10 No additional data available  
11  
12  
13  
14  
15  
16  
17  
18  
19  
20  
21  
22  
23  
24  
25  
26  
27  
28  
29  
30  
31  
32  
33  
34  
35  
36  
37  
38  
39  
40  
41  
42  
43  
44  
45  
46  
47  
48  
49  
50  
51  
52  
53  
54  
55  
56  
57  
58  
59  
60

## REFERENCES

1. Hubert HB, Feinleib M, McNamara PM, et al. Obesity as an independent risk factor for cardiovascular disease: A 26-year follow-up of participants in the Framingham Heart Study. *Circulation* 1983;**67**(5):968-77.
2. Morrison JA. Obesity and cardiovascular disease risk factors in Black and White girls: The NHLBI Growth and Health Study. *Am J Public Health* 1992;**82**(12):1613-20.
3. Abdullah A., Stoelwinder A., De Courten M., et al. The Duration of Obesity and the Risk of Cardiovascular Disease. The Conference on Clinical Epidemiology and Evidence-Based Medicine in Global Perspective 27-28 November. Bali, Indonesia, 2010.
4. Abdullah A, Stoelwinder J, Shortreed S, et al. The duration of obesity and the risk of type 2 diabetes. *Public Health Nutr* 2011;**14**(1):119-26.
5. Abdullah A, Wolfe R, Stoelwinder JU, et al. The number of years lived with obesity and the risk of all-cause and cause-specific mortality. *Int J Epidemiol* 2011;**40**(4):985-96.
6. He J, McGee D, Niu X, et al. Examining the dynamic association of BMI and mortality in the Framingham Heart Study. *Int J Environ Res Public Health* 2009;**6**(12):3115-26.
7. Abdullah A, Wolfe R, Mannan H, et al. Epidemiologic merit of obese-years, the combination of degree and duration of obesity. *Am J Epidemiol* 2012;**176**(2):99-107.
8. Leffondre K, Abrahamowicz M, Siemiatycki J, et al. Modeling smoking history: a comparison of different approaches. *Am J Epidemiol* 2002;**156**(9):813-23.
9. Neuner B, Wellmann J, Dasch B, et al. Modeling smoking history: a comparison of different approaches in the MARS study on age-related maculopathy. *Ann Epidemiol* 2007;**17**(8):615-21.
10. Dietrich T, Hoffmann K. A comprehensive index for the modeling of smoking history in periodontal research. *J Dent Res* 2004;**83**(11):859-63.
11. Dawber T. *The Framingham study: the epidemiology of atherosclerotic disease*. Cambridge, Mass.: Harvard University Press, 1980.
12. National Heart L, and Blood Institute, Boston University. The Framingham Heart Study: 50 years of research success. Framingham, MA: Framingham Heart Study; 2012. (<http://www.nhlbi.nih.gov/about/framingham/index.html>). (Accessed November 5, 2012).
13. D'Agostino RB, Sr., Vasan RS, Pencina MJ, et al. General cardiovascular risk profile for use in primary care: the Framingham Heart Study. *Circulation* 2008;**117**(6):743-53.
14. Wilson PWF, D'Agostino RB, Sullivan L, et al. Overweight and obesity as determinants of cardiovascular risk: the Framingham experience. *Arch Intern Med* 2002;**162**(16):1867-72.
15. Parmar MKB, Machin D. *Survival analysis : a practical approach*. Chichester ; New York: J. Wiley, 1995.
16. Fisher LD, Lin DY. Time-Dependent Covariates in The Cox Proportional-Hazards Regression Model. *Annual Review of Public Health* 1999;**20**(1):145-57.

17. Kleinbaum DG, Klein M. *Survival Analysis: A Self-Learning Text*. the United States of America: Springer, 2005.
18. Cleophas TJM, Zwinderman AH. *Machine Learning in Medicine*. Dordrecht: Springer, 2013.
19. Akaike H. A new look at the statistical model identification. *IEEE Transactions on Automatic Control* 1974;**19**(6):716–23.
20. StataCorp LP. *Stata Survival Analysis and Epidemiological Tables Reference Manual Release 10*. College Station, TX: Stata Corporation 2007.
21. Preston SH, Mehta NK, Stokes A. Modeling obesity histories in cohort analyses of health and mortality. *Epidemiology* 2013;**24**(1):158-66.
22. National Center for Health Statistics National *HaNESH*, MD: National Center for Health Statistics; (<http://www.cdc.gov/nchs/nhanes.htm>). (Accessed 3 November 2002). Secondary.
23. CDC. State-Specific Prevalence of Obesity Among Adults — United States. *MMWR* 2008;**57**(36):765-8.
24. World Health Organization. Global Database on Body Mass Index. Secondary Global Database on Body Mass Index 2014. <http://apps.who.int/bmi/index.jsp>.
25. Lee JM, Pilli S, Gebremariam A, et al. Getting heavier, younger: trajectories of obesity over the life course. *Int J Obes (Lond)* 2010;**34**(4):614-23.
26. Vazquez G, Duval S, Jacobs DR, Jr., et al. Comparison of Body Mass Index, Waist Circumference, and Waist/Hip Ratio in Predicting Incident Diabetes: A Meta-Analysis. *Epidemiol Rev* 2007;**29**(1):115-28.
27. Lagergren J, Bergström R, Lindgren A, et al. The role of tobacco, snuff and alcohol use in the aetiology of cancer of the oesophagus and gastric cardia. *Int J Cancer* 2000;**85**(3):340-6.
28. Yuan JM, Wang XL, Xiang YB, et al. Non-dietary risk factors for nasopharyngeal carcinoma in Shanghai, China. *Int J Cancer* 2000;**85**(3):364-9.

Table 1: Illustration of the Calculation of an Obese-Years Metric for a Single Hypothetical Individual

| ID | Examination  | Interval<br>Between<br>Examinations,<br>years <sup>a</sup> | Body<br>Mass<br>Index <sup>b</sup> | Degree of<br>Obesity | Duration of<br>Obesity, years | Obese-Years <sup>a</sup> | Cumulative<br>Obese-Years |
|----|--------------|------------------------------------------------------------|------------------------------------|----------------------|-------------------------------|--------------------------|---------------------------|
| 6  | 1 (baseline) | -                                                          | 28                                 | 0                    | -                             | 0                        | 0                         |
| 6  | 2            | 2                                                          | 30                                 | 1                    | 0                             | 0                        | 0                         |
| 6  | 3            | 2                                                          | 32                                 | 3                    | 2                             | 2                        | 2                         |
| 6  | 4            | 3                                                          | 34                                 | 5                    | 3                             | 9                        | 11                        |
| 6  | 5            | 1                                                          | 32                                 | 3                    | 1                             | 5                        | 16                        |
| 6  | 6            | 2                                                          | 30                                 | 1                    | 2                             | 6                        | 22                        |
| 6  | 7            | 1.5                                                        | 28                                 | 0                    | 1.5                           | 1.5                      | 23.5                      |
| 6  | 8            | 2.5                                                        | 28                                 | 0                    | 0                             | 0                        | 23.5                      |
| 6  | 9            | 2                                                          | 30                                 | 1                    | 0                             | 0                        | 23.5                      |
| 6  | 10           | 1.5                                                        | 32                                 | 3                    | 1.5                           | 1.5                      | 25                        |
| 6  | 11           | 3                                                          | 34                                 | 5                    | 3                             | 9                        | 34                        |
| 6  | 12           | 2                                                          | 32                                 | 3                    | 2                             | 10                       | 44                        |
| 6  | 13           | 2                                                          | 30                                 | 1                    | 2                             | 6                        | 50                        |

<sup>a</sup> All intervals refer to the interval between the current examination and the prior examination

<sup>b</sup> Body mass index; weight (kg)/height (m)<sup>2</sup>.

Table 2: Characteristics of the study population<sup>a</sup>

| Participant Characteristics                                       | Number |       |         | Percentage |       |         | Median |       |         | Range     |           |           | P value <sup>e</sup> |
|-------------------------------------------------------------------|--------|-------|---------|------------|-------|---------|--------|-------|---------|-----------|-----------|-----------|----------------------|
|                                                                   | Total  | Males | Females | Total      | Males | Females | Total  | Males | Females | Total     | Males     | Females   |                      |
| Eligible sample                                                   | 5,036  | 2,237 | 2,799   | 100        | 44    | 46      |        |       |         |           |           |           |                      |
| Participants ever obese during study follow-up                    | 1,247  | 494   | 750     | 24.7       | 40    | 60      |        |       |         |           |           |           | 0.000                |
| Age at baseline (years)                                           |        |       |         |            |       |         | 43     | 43    | 43      | 28–62     | 29–62     | 28–62     | 0.483                |
| Born in the United States                                         | 4,082  | 1,826 | 2,256   | 81         | 44.7  | 55.3    |        |       |         |           |           |           | 0.355                |
| Marital status                                                    |        |       |         |            |       |         |        |       |         |           |           |           | 0.000                |
| Single                                                            | 452    | 117   | 335     | 9          | 5     | 12      |        |       |         |           |           |           |                      |
| Married                                                           | 4,269  | 2,075 | 2,194   | 85         | 93    | 78      |        |       |         |           |           |           |                      |
| Widowed, divorced, or separated                                   | 315    | 45    | 270     | 6          | 2     | 10      |        |       |         |           |           |           |                      |
| Educational level                                                 |        |       |         |            |       |         |        |       |         |           |           |           | 0.000                |
| Eighth grade or less                                              | 1,374  | 616   | 758     | 27         | 28    | 27      |        |       |         |           |           |           |                      |
| High school                                                       | 2,306  | 1,022 | 1,284   | 46         | 46    | 46      |        |       |         |           |           |           |                      |
| College                                                           | 752    | 392   | 360     | 15         | 18    | 13      |        |       |         |           |           |           |                      |
| Graduate school                                                   | 604    | 207   | 397     | 12         | 9     | 14      |        |       |         |           |           |           |                      |
| Health behavior                                                   |        |       |         |            |       |         |        |       |         |           |           |           |                      |
| Current smoker at baseline                                        | 2,583  | 1,435 | 1,154   | 52         | 55    | 45      |        |       |         |           |           |           | 0.000                |
| Ever-smoker during study follow-up period                         | 3,178  | 1,837 | 1,341   | 63         | 58    | 42      |        |       |         |           |           |           | 0.000                |
| Physical activity score at examination 4                          |        |       |         |            |       |         | 32     | 33    | 31      | 25–83     | 25–83     | 25–55     | 0.000                |
| Alcohol drinking at examination 2, yes, ounces/month <sup>b</sup> | 3,183  | 1,648 | 1,535   | 63         | 52    | 48      | 8      | 15    | 4       | 1–360     | 1–360     | 1–240     | 0.000                |
| Body weight characteristics                                       |        |       |         |            |       |         |        |       |         |           |           |           |                      |
| Body mass index at baseline (kg/m <sup>2</sup> ) <sup>c</sup>     |        |       |         |            |       |         | 25.1   | 25.6  | 24.6    | 16.2–46.3 | 16.8–38.1 | 16.2–46.3 | 0.000                |
| Underweight (<18.5)                                               | 65     | 14    | 51      | 1          | 1     | 2       |        |       |         |           |           |           | 0.000                |
| Normal weight (18.5–24.9)                                         | 2,405  | 945   | 1,460   | 48         | 42    | 52      |        |       |         |           |           |           |                      |
| Overweight (25–29.9)                                              | 1,989  | 1,057 | 932     | 40         | 47    | 33      |        |       |         |           |           |           |                      |
| Obese (≥30)                                                       | 567    | 217   | 350     | 11         | 10    | 13      |        |       |         |           |           |           |                      |
| Cumulative obesity duration (years) <sup>d</sup>                  |        |       |         |            |       |         | 12     | 10    | 12      | 2–46      | 2–46      | 2–46      | 0.001                |
| Cumulative obese-years <sup>d</sup>                               |        |       |         |            |       |         | 24     | 15    | 31      | 2–556     | 2–251     | 2–556     | 0.000                |
| Cumulative obese-years category <sup>d</sup>                      |        |       |         |            |       |         |        |       |         |           |           |           | 0.000                |
| 1–24.9                                                            | 579    | 269   | 319     | 52         | 62    | 45      |        |       |         |           |           |           |                      |
| 25–49.9                                                           | 192    | 77    | 115     | 17         | 18    | 17      |        |       |         |           |           |           |                      |
| 50–74.9                                                           | 119    | 31    | 87      | 11         | 7     | 13      |        |       |         |           |           |           |                      |

1  
2  
3  
4  
5  
6  
7  
8  
9  
10  
11  
12  
13  
14  
15  
16  
17  
18  
19  
20  
21  
22  
23  
24  
25  
26  
27  
28  
29  
30  
31  
32  
33  
34  
35  
36  
37  
38  
39  
40  
41  
42  
43  
44  
45  
46  
47  
48  
49

| Participant Characteristics              | Number |       |         | Percentage |       |         | Median |       |         | Range |       | P value <sup>e</sup> |
|------------------------------------------|--------|-------|---------|------------|-------|---------|--------|-------|---------|-------|-------|----------------------|
|                                          | Total  | Males | Females | Total      | Males | Females | Total  | Males | Females | Total | Males |                      |
| ≥75                                      | 233    | 54    | 179     | 21         | 13    | 26      |        |       |         |       |       |                      |
| Cardiovascular disease (any type of CVD) | 2753   | 1,375 | 1,378   | 55         | 50    | 50      |        |       |         |       |       | 0.000                |
| Hard CVD                                 | 1890   | 952   | 938     | 38         | 51    | 49      |        |       |         |       |       | 0.000                |
| Coronary heart disease                   | 1872   | 1036  | 836     | 37         | 55    | 45      |        |       |         |       |       | 0.000                |
| Heart attack                             | 1538   | 920   | 618     | 31         | 60    | 40      |        |       |         |       |       | 0.000                |
| Myocardial infarction                    | 1105   | 666   | 439     | 22         | 60    | 40      |        |       |         |       |       | 0.000                |
| Coronary insufficiency                   | 259    | 146   | 113     | 5          | 56    | 44      |        |       |         |       |       | 0.000                |
| Angina pectoris                          | 945    | 498   | 447     | 19         | 53    | 47      |        |       |         |       |       | 0.000                |
| Cerebrovascular accident                 | 950    | 411   | 539     | 19         | 43    | 57      |        |       |         |       |       | 0.426                |
| Congestive heart failure                 | 876    | 397   | 479     | 17         | 45    | 55      |        |       |         |       |       | 0.556                |

<sup>a</sup> Participants were free from existing diabetes, cardiovascular disease, and cancer at baseline.

<sup>b</sup> One ounce ≈ 28.35 g. <sup>c</sup> Body mass index: weight (kg)/height (m)<sup>2</sup>.

<sup>d</sup> For those who were obese during study follow-up.

<sup>e</sup> This P value is for the comparison of males vs females.

For peer review only

Table 3: Incidence of Cardiovascular Disease (Events/1,000 Person-Years) According to Categories of Cumulative Obese-Years

|                         | Obese-Years | Events | PYFU    | Incident Rate       |
|-------------------------|-------------|--------|---------|---------------------|
| <b>Total population</b> |             |        |         |                     |
|                         | 0 year      | 2,177  | 116,681 | 18.66 (17.89-19.46) |
|                         | 1-25 years  | 276    | 10,846  | 25.45 (22.62-28.63) |
|                         | 25-50 years | 124    | 4,509   | 27.50 (23.06-32.80) |
|                         | 50-75 years | 78     | 2,365   | 32.98 (26.42-41.18) |
|                         | >=75years   | 186    | 4,517   | 41.17 (35.66-47.54) |
| <b>Males</b>            |             |        |         |                     |
|                         | 0 year      | 1,138  | 46,950  | 24.24 (22.87-25.69) |
|                         | 1-25 years  | 134    | 4,669   | 28.70 (24.23-34.00) |
|                         | 25-50 years | 56     | 1,710   | 32.75 (25.21-42.56) |
|                         | 50-75 years | 36     | 720     | 50.02 (36.08-69.34) |
|                         | >=75years   | 49     | 951     | 51.51 (38.93-68.16) |
| <b>Females</b>          |             |        |         |                     |
|                         | 0 year      | 1,039  | 69,731  | 14.90 (14.02-15.83) |
|                         | 1-25 years  | 142    | 6,177   | 22.99 (19.50-27.10) |
|                         | 25-50 years | 68     | 2,799   | 24.30 (19.16-30.81) |
|                         | 50-75 years | 42     | 1,645   | 25.53 (18.87-34.54) |
|                         | >=75years   | 137    | 3,566   | 38.42 (32.49-45.42) |

PYFU = Persons years of follow-up



Table 4: Risk of Cardiovascular Disease According to Categories of Obese-Years

|                              | Hazard Ratio (95% Confidence Interval) |                  |                  |
|------------------------------|----------------------------------------|------------------|------------------|
|                              | Total population*                      | Males            | Females          |
| <b>Model 1</b>               |                                        |                  |                  |
| 0 obese-years                | 1                                      | 1                | 1                |
| 1-25 obese-years             | 1.28 (1.13-1.45)                       | 1.18 (0.99-1.41) | 1.37 (1.15-1.64) |
| 25-50 obese-years            | 1.31 (1.09-1.57)                       | 1.28 (0.97-1.67) | 1.40 (1.09-1.79) |
| 50-75 obese-years            | 1.50 (1.21-1.85)                       | 1.78 (1.35-2.36) | 1.46 (1.08-1.96) |
| >=75 obese-years             | 1.59 (1.36-1.85)                       | 1.72 (1.33-2.22) | 1.78 (1.48-2.15) |
| Dose-response <i>P</i> value | 0.0001                                 | 0.0001           | 0.0001           |
| <b>Model 2</b>               |                                        |                  |                  |
| 0 obese-years                | 1                                      | 1                | 1                |
| 1-25 obese-years             | 1.26 (1.11-1.43)                       | 1.18 (0.99-1.41) | 1.33 (1.11-1.60) |
| 25-50 obese-years            | 1.32 (1.10-1.59)                       | 1.29 (0.99-1.70) | 1.35 (1.05-1.74) |
| 50-75 obese-years            | 1.55 (1.27-1.91)                       | 1.80 (1.36-2.38) | 1.40 (1.04-1.88) |
| >=75 obese-years             | 1.74 (1.50-2.03)                       | 1.71 (1.32-2.21) | 1.71 (1.42-2.07) |
| Dose-response <i>P</i> value | 0.0001                                 | 0.0001           | 0.0001           |
| <b>Model 3</b>               |                                        |                  |                  |
| 0 obese-years                | 1                                      | 1                | 1                |
| 1-25 obese-years             | 1.31 (1.15-1.48)                       | 1.22 (1.02-1.45) | 1.37 (1.14-1.65) |
| 25-50 obese-years            | 1.37 (1.14-1.65)                       | 1.39 (1.05-1.83) | 1.36 (1.05-1.76) |
| 50-75 obese-years            | 1.62 (1.32-1.99)                       | 1.89 (1.42-2.51) | 1.44 (1.08-1.94) |
| >=75 obese-years             | 1.80 (1.54-2.10)                       | 1.81 (1.39-2.36) | 1.74 (1.44-2.10) |
| Dose-response <i>P</i> value | 0.0001                                 | 0.0001           | 0.0001           |

Model 1 adjusted for age.

Model 2 adjusted for age, marital status, education, country of birth.

Model 3 adjusted for age, marital status, education, country of birth, smoking status, alcohol consumption, physical activity

\* Analyses for total population were adjusted for sex.

Table 5: The Hazard Ratio of Cardiovascular Disease per 10 Obese-Years

| CVD                                            | Hazard Ratio per additional 10 Obese-Years (95% Confidence Interval) |                         |                         |
|------------------------------------------------|----------------------------------------------------------------------|-------------------------|-------------------------|
|                                                | Total population*                                                    | Males                   | Females                 |
| <b>Cardiovascular diseases (all types CVD)</b> |                                                                      |                         |                         |
| Model 1                                        | 1.03 (95% CI 1.02-1.04)                                              | 1.05 (95% CI 1.03-1.07) | 1.03 (95% CI 1.02-1.04) |
| Model 2                                        | 1.03 (95% CI 1.02-1.04)                                              | 1.05 (95% CI 1.03-1.07) | 1.03 (95% CI 1.02-1.04) |
| Model 3                                        | 1.04 (95% CI 1.03-1.05)                                              | 1.06 (95% CI 1.04-1.08) | 1.03 (95% CI 1.02-1.04) |
| <b>Hard Cardiovascular diseases (Hard CVD)</b> |                                                                      |                         |                         |
| Model 1                                        | 1.03 (95% CI 1.02-1.04)                                              | 1.06 (95% CI 1.04-1.08) | 1.03 (95% CI 1.02-1.05) |
| Model 2                                        | 1.04 (95% CI 1.03-1.05)                                              | 1.06 (95% CI 1.04-1.08) | 1.03 (95% CI 1.02-1.04) |
| Model 3                                        | 1.04 (95% CI 1.03-1.05)                                              | 1.06 (95% CI 1.04-1.08) | 1.03 (95% CI 1.02-1.04) |
| <b>Coronary heart disease (CHD)</b>            |                                                                      |                         |                         |
| Model 1                                        | 1.02 (95% CI 1.01-1.03)                                              | 1.03 (95% CI 1.01-1.06) | 1.03 (95% CI 1.02-1.04) |
| Model 2                                        | 1.03 (95% CI 1.02-1.04)                                              | 1.03 (95% CI 1.01-1.06) | 1.03 (95% CI 1.02-1.04) |
| Model 3                                        | 1.03 (95% CI 1.02-1.04)                                              | 1.04 (95% CI 1.02-1.06) | 1.03 (95% CI 1.02-1.04) |
| <b>Cerebrovascular accident (CVA)</b>          |                                                                      |                         |                         |
| Model 1                                        | 1.03 (95% CI 1.02-1.04)                                              | 1.06 (95% CI 1.04-1.09) | 1.03 (95% CI 1.01-1.04) |
| Model 2                                        | 1.03 (95% CI 1.02-1.04)                                              | 1.06 (95% CI 1.04-1.09) | 1.02 (95% CI 1.01-1.04) |
| Model 3                                        | 1.03 (95% CI 1.02-1.04)                                              | 1.06 (95% CI 1.04-1.09) | 1.02 (95% CI 1.01-1.04) |
| <b>Congestive heart failure (CHF)</b>          |                                                                      |                         |                         |
| Model 1                                        | 1.05 (95% CI 1.03-1.06)                                              | 1.06 (95% CI 1.04-1.09) | 1.05 (95% CI 1.03-1.06) |
| Model 2                                        | 1.05 (95% CI 1.04-1.06)                                              | 1.06 (95% CI 1.04-1.09) | 1.04 (95% CI 1.03-1.06) |
| Model 3                                        | 1.05 (95% CI 1.04-1.06)                                              | 1.06 (95% CI 1.04-1.09) | 1.04 (95% CI 1.03-1.06) |

Model 1 adjusted for age.

Model 2 adjusted for age, marital status, education, country of birth.

Model 3 adjusted for age, marital status, education, country of birth, smoking status, alcohol consumption, physical activity

\* For total population also adjusted for sex

Table 6: Comparison of the Obese-Years Metric, Body Mass Index and Obesity Duration as Predictors of the Risk for Cardiovascular Disease

| Constructs                                     | Akaike Information Criterion (AIC) |       |         |
|------------------------------------------------|------------------------------------|-------|---------|
|                                                | Total population                   | Males | Females |
| <b>Cardiovascular diseases (all types CVD)</b> |                                    |       |         |
| Construct 1: Level of BMI                      | 43390                              | 19227 | 20307   |
| Construct 2: Duration of obesity               | 43379                              | 19221 | 20306   |
| Construct 3: Obese-Years                       | 43368                              | 19209 | 20294   |
| <b>Hard Cardiovascular diseases (Hard CVD)</b> |                                    |       |         |
| Construct 1: Level of BMI                      | 34069                              | 15102 | 15976   |
| Construct 2: Duration of obesity               | 34065                              | 15099 | 15968   |
| Construct 3: Obese-Years                       | 34050                              | 15096 | 15955   |
| <b>Coronary heart disease (CHD)</b>            |                                    |       |         |
| Construct 1: Level of BMI                      | 29038                              | 14355 | 12156   |
| Construct 2: Duration of obesity               | 29039                              | 14354 | 12162   |
| Construct 3: Obese-Years                       | 29028                              | 14351 | 12152   |
| <b>Cerebrovascular accident (CVA)</b>          |                                    |       |         |
| Construct 1: Level of BMI                      | 13575                              | 5211  | 7147    |
| Construct 2: Duration of obesity               | 13577                              | 5208  | 7141    |
| Construct 3: Obese-Years                       | 13573                              | 5208  | 7136    |
| <b>Congestive health failure (CHF)</b>         |                                    |       |         |
| Construct 1: Level of BMI                      | 13141                              | 5275  | 6667    |
| Construct 2: Duration of obesity               | 13122                              | 5263  | 6663    |
| Construct 3: Obese-Years                       | 13104                              | 5255  | 6649    |

Each construct was split into 11 categories; 1 represents "not obese" and 2-11 represent deciles of obesity exposure (level, duration and obese-years)

Each model adjusted for sex, age, marital status, education, smoking, alcohol consumption, and physical activity.

**Title:**

Estimating the risk of cardiovascular disease using an obese-years metric

**Running title:**

Obese-years and cardiovascular disease

**Authors:**

Asnawi Abdullah, PhD<sup>1,3</sup>

Fauzi Ali Amin, MPH<sup>2</sup>

Johannes Stoelwinder, MD<sup>3</sup>

Stephanie K Tanamas, PhD<sup>4</sup>

Rory Wolfe, PhD<sup>3</sup>

Jan Barendregt, PhD<sup>5</sup>

Anna Peeters, PhD<sup>3,4</sup>

**Authors Address:**

<sup>1</sup> Department of Biostatistics and Population Health. Faculty of Public Health, University Muhammadiyah Aceh, Indonesia;

<sup>2</sup> Department of Public Health Nutrition. Faculty of Public Health, University Muhammadiyah Aceh, Indonesia;

<sup>3</sup> Department of Epidemiology and Preventive Medicine, School of Public Health and Preventive Medicine, Monash University, Australia;

<sup>4</sup> Baker IDI Heart and Diabetes Institute, Australia;

<sup>5</sup> School of Population Health, University Queensland, Australia.

**Correspondence to:**

Asnawi Abdullah, Department of Biostatistics and Population Health, Faculty of Public Health, University of Muhammadiyah Aceh, Jln. Leung Bata, Batoh, Banda Aceh, Indonesia, 23245. Phone +6265131054, Fax. +6265131053, Email: Asnawi.Abdullah@fkm.unmuha.ac.id

**Word count:**

| Text = ~~2960~~ 3325 words; Abstract = ~~30294~~ words; ~~25-28~~ references, Tables ~~56~~

**ABSTRACT:**

**Objective:** To examine the association between obese-years and the risk of cardiovascular disease (CVD).

**Study design:** Prospective cohort study for approximately 50 years of follow-up.

**Setting:** Boston, USA

**Participants:** 5036 participants of the original Framingham Heart Study were examined.

**Methods:** The variable of obese-years was calculated by multiplying for each participant the number of BMI units above  $30.29 \text{ kg/m}^2$  by the number of years lived at that BMI during approximately 50 years of follow-up. The association between obese-years and the outcome CVD was analyzed by using time-dependent Cox regression adjusted for potential confounders and compared with the current other models using the Akaike Information Criterion (AIC). The lowest AIC indicated better fit.

**Primary outcome:** Cardiovascular diseases.

**The Results:** The average median cumulative obese-years was 63.24 (range, 2–556 obese-years). During 138,918 person-years of follow-up, 2753 (55%) participants were diagnosed with CVD cardiovascular disease. The incidence rates and adjusted hazards ratios (OR-AHR) for CVD increased with an increase in the number of obese-years. OR-AHR for the categories 1–24.9, 25–49.9, 50–74.9, and  $\geq 75$  obese-years was were respectively 1.31 (95% CI: 1.15–1.48), 1.37 (95% CI: 1.14–1.65), 1.62 (95% CI: 1.32–1.99), and 1.80 (95% CI: 1.54–2.10) compared with those who were never obese (i.e. had zero obese-years) respectively. A dose-response relationship (across the 5 categories) was significant ( $P$  trend = 0.001). Effect The effect of obese-years was higher stronger in males than females. For every 10 unit increase in obese-years, the AOR of CVD increased by 6% (95% CI 4% to 8%) for males and 3% (95% CI 2% to 4%) for females. The AIC was lowest in for the model containing obese-years compared with models containing either the level of BMI or the duration of obesity alone.

**Conclusions:** This study demonstrates that obese-years metric conceptually captures the cumulative damage of obesity on body systems, and is found to provide slightly more precise estimation of the risk of CVD than level or the duration of obesity alone.

1  
2  
3  
4  
5  
6  
7  
8  
9  
10  
11  
12  
13  
14  
15  
16  
17  
18  
19  
20  
21  
22  
23  
24  
25  
26  
27  
28  
29  
30  
31  
32  
33  
34  
35  
36  
37  
38  
39  
40  
41  
42  
43  
44  
45  
46  
47  
48  
49  
50  
51  
52  
53  
54  
55  
56  
57  
58  
59  
60

*This study confirms that the obese-years construct is an independent risk factor for CVD. Obese-years metric is a better predictor the risk of CVD although it shows similar risk estimation to other two models.*

**Key Words:** Obesity, BMI, the duration of obesity, obese-years, risk factor, cardiovascular disease

For peer review only

**Strengths and limitations of this study**

- The obese-years metric combines the number of years lived with obesity and the level of BMI to examine the total effect of obesity. Examining the total effect of obesity by combining the number years lived with obesity and the level of BMI into a single measurement of obese years.
- The Framingham Heart Study is A a long term prospective cohort study with approximately 50 years of follow-up of follow-up followed-up with, and biennial measurements of body weight, covariates and health outcomes.
- By using time-dependent Cox proportional hazards regression, Tthe analysis takes into account changes in covariates during study follow-up and adjusted-adjusts for a large number of potential confounding variables.

**Limitations of this study**

- The obese-years constructmetric was developed based on the measurement of BMI. It is unclear whether using anthropometric measures other than BMI would produce different results.
- Data used for this study was from a relatively old cohort study, which began in 1948.

## Background

~~The association between Obesity has been associated with an increased risk of and cardiovascular disease (CVD) is well known<sup>1 2</sup>. However, these findings are generally based on analysing only the level of BMI in relation to CVD. More recently, studies have demonstrated the importance of taking into account the potential cumulative effect of the duration of obesity, rather than the simple assessment of obesity at a single point in time (e.g. at baseline). In addition, we have recently demonstrated that the duration of obesity has been shown to be a risk factor for CVD<sup>3</sup>, type-2 diabetes<sup>4</sup> and mortality<sup>5</sup>, independent of level of body mass index (BMI)<sup>3</sup>. Nevertheless, analyses based on either level of BMI alone or duration lived with obesity alone. However, the quantification of these association by only analysing the level of BMI<sup>6</sup> or the duration lived with obesity<sup>4-5</sup>. This approach may not reflect the total effect of obesity and may underestimated the risk of CVD associated with attributable to obesity.~~

We have recently demonstrated the additional benefit of ~~constructs~~ combining the level of obesity with the number of years lived with obesity into a single measure, finding that an obese-years ~~construct~~metric is a better predictor of the risk of type-2 diabetes than level of BMI or duration of obesity alone<sup>7</sup>. A ~~similar approach that has been used in smoking studies, examining the adverse~~



~~health effects associated with the combination of number of cigarettes or packs smoked per day (degree) and duration of smoking as a cigarette-years or pack-years<sup>8-10</sup>.~~

The use of ~~a similar construct for body weight~~the obese-years construct metric, to estimate the risk of CVD has not been investigated yet. We hypothesized that the obese-years construct metric is likely a similar independent risk factor for CVD and would provide an improved estimation of the risk of future CVD. This study aimed to examine the association between obese-years and risk of CVD and to examine whether the obese-years construct metric ~~was~~ a better predictor for risk of CVD than current BMI or duration of obesity alone. We investigated these objectives using the ~~original~~-Framingham Heart Study (FHS), a long term prospective cohort study where body weight, health outcomes and other covariates were measured ~~regularly~~biennially for almost 50 years<sup>11</sup>.

## METHODS

### Data source

We used data from the ~~original~~-Framingham Heart Study (FHS)<sup>12</sup>. In this prospective cohort study, 5,209 participants (aged 28–62 years at the time of enrolment) ~~were examined regularly at 2-years intervals~~attended biennial

1  
2  
3 examinations for approximately 50 years beginning from 1948. For the purpose  
4  
5 of this study, only participants who were free from CVD (any types), cancer and  
6  
7 type-2 diabetes at baseline were included in the analysis ( $n = 5,036$ ).  
8  
9

### 14 **Variables: measurement, missing and imputation**

17 Most ~~of~~ variables in the FHS ~~was~~ were measured regularly at ~~every~~ the two-  
18 years yearly interval examinations, including body weight, height, demographic  
19  
20 variables, health behaviors, and health outcomes (including cardiovascular  
21  
22 disease)<sup>11</sup>. ~~However~~ sSome values are missing by design where variables were  
23  
24 not collected at every examination. For example ~~the variables of~~ current  
25  
26 smoking status was not recorded at four examinations (2, 3, 6 and 17),  
27  
28 cholesterol was not measured at seven examinations (11, 12, 17-20 and 22),  
29  
30 alcohol consumption was measured only ~~at~~ in eight examinations (2, 4, 7, 19,  
31  
32 20–23), and physical activity was measured only at four examinations (4, 11, 12,  
33  
34 and 19). ~~For~~ In this circumstance, the nearest most contemporary measured  
35  
36 value of the ~~covariate~~ variable was used in place of missing values at the  
37  
38 examination times when the variable was not measured. Another missing data  
39  
40 circumstance was when missing values occurred intermittently ~~missing one or~~  
41  
42 more values during study follow-up; for example body weight and hence BMI.  
43  
44  
45  
46  
47  
48  
49  
50  
51  
52  
53  
54 In this case missing values for BMI were imputed with a conditional mean  
55  
56  
57  
58  
59  
60

1  
2  
3 estimated by a multiple linear regression model using age at prior exam, sex  
4  
5 and several transformations of the previously measured BMI (BMI, log BMI, BMI  
6  
7 squared and BMI as a categorical variable). Methods of measurement of these  
8  
9 variables have been described in detail elsewhere<sup>4,7</sup>.

### 20 **The level of obesity, duration and obese-years measurement**

21  
22  
23  
24 A participant was considered obese at a given examination if their BMI was  
25  
26 greater than or equal to 30 kg/m<sup>2</sup>. The level of obesity was defined as follows:  
27  
28 (1) if BMI < 30 kg/m<sup>2</sup>, the level was zero; and (2) if BMI ≥ 30 kg/m<sup>2</sup>, the level  
29  
30 was BMI minus 29 kg/m<sup>2</sup>. For example, if BMI was 35 kg/m<sup>2</sup>, the level was 6 (35  
31  
32 – 29) obese units.  
33  
34  
35  
36  
37  
38  
39  
40

41  
42 The duration of obesity ~~was defined using~~followed a similar definition to that  
43  
44 ~~as has been~~described previously<sup>4</sup>. The duration of obesity was calculated for  
45  
46 those individuals with at least two consecutive examinations with the  
47  
48 occurrences of obesity (which ~~implies is interpreted as indicating~~at least two  
49  
50 years of being continuously obese). The requirement for two consecutive  
51  
52 examinations with obesity was to avoid the potential misclassification of body  
53  
54  
55  
56  
57  
58  
59  
60

1  
2  
3 weight, either due to measurement error or fluctuations between the  
4  
5 borderline of the 'overweight' category or the 'obese' category. For those  
6  
7 individuals without two consecutive obesity occurrences, duration was  
8  
9 considered to be zero at all exams. For those individuals with two consecutive  
10  
11 obesity occurrences, the beginning of their obesity duration interval was  
12  
13 defined as the date of the first of these two examinations and from that time,  
14  
15 the individual was considered to be continuously obese until either the first of  
16  
17 two consecutive non-obese examinations, or death, or the end of follow-up at  
18  
19 examination 24. ~~The duration increased incrementally at each exam according~~  
20  
21 ~~to the time (in years) between the current exam and the first obese~~  
22  
23 ~~examination.~~ Individuals could have multiple periods of obesity duration during  
24  
25 follow-up.  
26  
27  
28  
29  
30  
31  
32  
33  
34  
35  
36  
37  
38  
39  
40  
41  
42  
43  
44  
45  
46  
47  
48  
49  
50  
51  
52  
53  
54  
55  
56  
57  
58  
59  
60

~~The level of obesity and the duration of obesity then was combined into a~~  
~~single variable called obese-years. Obese-years lived were The variable was~~  
~~calculated at each examination as the defined level of obesity (in "obese units")~~  
~~multiplied by the defined duration of obesity (in years). The cumulative number~~  
~~of obese-years was calculated at each examination as a sum of all obese-year~~  
~~"exposures" up to and including that examination as has been illustrated in the~~  
~~previous paper<sup>7</sup>~~

1  
2  
3  
4  
5 The level of obesity and the duration of obesity were combined as a single  
6  
7 variable called obese-years. Obese-years was calculated at each examination as  
8  
9 the defined level of obesity (in "obese units") multiplied by the defined  
10  
11 duration of obesity (in years). Then the cumulative total of obese-years for  
12  
13 each examination was calculated as a sum of all obese-year "exposures" up to  
14  
15 and including that examination.  
16  
17  
18  
19  
20  
21  
22

23 Table 1 illustrates the calculation of obese-years for a single individual. This  
24  
25 participant first had a measurement of obesity at examination 2 and was  
26  
27 assigned obesity duration of zero at this examination. At examination 3, this  
28  
29 participant was assumed to have lived with obesity for 2 years (the interval  
30  
31 between examination 2 and examination 3) with a degree of obesity of 1  
32  
33 kg/m<sup>2</sup>. This approach assumes that an individual's BMI is carried forward from  
34  
35 a given examination (i.e., examination 2) and does not change until a different  
36  
37 BMI value at a subsequent examination (i.e., examination 3). The number of  
38  
39 obese-years at examination 3 was therefore 2 obese-years (1 BMI unit X 2  
40  
41 years in the preceding interval). From examination 3 to examination 4 (a 3 year  
42  
43 interval), the participant was still obese with a degree of obesity of 3 kg/m<sup>2</sup>  
44  
45 (BMI 32 kg/m<sup>2</sup>). At examination 4, the number of obese-years was 9 (3BMI unit  
46  
47  
48  
49  
50  
51  
52  
53  
54  
55  
56  
57  
58  
59  
60

1  
2  
3 X 3 years) and the cumulative obese-years at this examination was 11 obese-  
4 years (2 plus 9).  
5  
6  
7  
8  
9

10 This method implies that individuals accumulating 50 obese-years, for example,  
11 could have reached this quantity either by having been obese with BMI of 30  
12 kg/m<sup>2</sup> for approximately 50 years or by having been obese with BMI of 34  
13 kg/m<sup>2</sup> for approximately 10 years or, indeed, many other combinations.  
14  
15  
16  
17  
18  
19  
20  
21

## 22 **Measurement of the outcome and time to event**

23  
24  
25  
26  
27 The main outcome of interest in this study was CVD incident~~et~~ (the first event  
28 of any type of CVD; defined as a composite of coronary heart disease (CHD),  
29 cerebrovascular accident (CVA), peripheral artery disease, and congestive heart  
30 failure (CHF)<sup>13</sup>. Additional outcomes were individual types of CVD: hard CVD,  
31 CHD, CVA, and CHF. Hard CVD was defined as a composite of hard CHD  
32 (coronary death, myocardial infarction), stroke (fatal and nonfatal), peripheral  
33 artery disease and heart failure. In the OFHS, the criteria for each cardiovascular  
34 outcome during follow-up were standardized<sup>14</sup> and a panel of Framingham  
35 investigators made the decision an adjudication regarding diagnosis. CHD  
36 includes the diagnoses of (1) angina pectoris, evidenced by a typical history of  
37 chest pain on a physician-administered questionnaire; (2) myocardial infarction,  
38 determined by specified electrocardiographic changes, diagnostic elevation of  
39  
40  
41  
42  
43  
44  
45  
46  
47  
48  
49  
50  
51  
52  
53  
54  
55  
56  
57  
58  
59  
60

1  
2  
3 serum enzymes with prolonged ischemic chest pain, or on autopsy; (3)  
4  
5 coronary insufficiency, defined as prolonged ischemic chest pain accompanied  
6  
7  
8 by transient ischemic abnormalities on ~~the~~-ECG; and (4) sudden (in less than 1  
9  
10 hour) or non-sudden coronary death. CHF was indicated when at least two  
11  
12 major or one major and two minor diagnostic conditions existed concurrently  
13  
14 upon examination.  
15  
16  
17  
18  
19  
20  
21  
22

23 Time to event was measured as the time from cohort entry until the date a  
24  
25 participant was diagnosed as having ~~cardiovascular disease~~CVD. Individuals  
26  
27 who died or reached the end of the follow-up (examination 24) before  
28  
29 developing CVD were censored at date of death or examination 24,  
30  
31 respectively.  
32  
33  
34  
35  
36  
37  
38  
39  
40  
41

### 42 **Data analysis**

43 To model the relationship between the various measures of obesity and -risk of  
44  
45 CVD in a dynamic survival model way<sup>6</sup> ~~an {extended time-dependent~~Cox  
46  
47 regression model involving time-dependent (time-varying) variables<sup>15-18</sup> was  
48  
49 used. The demographic and health behavior variables included in the analysis  
50  
51 were age, sex and country of birth at baseline, and the time-varying values of,  
52  
53  
54 sex and country of birth at baseline, and the time-varying values of sex,  
55  
56  
57  
58  
59  
60

1  
2  
3 education level, ~~country of birth~~, marital status, smoking status, alcohol  
4  
5 consumption (ounces/month), and physical activity. ~~Most of these variables~~  
6  
7 ~~included in the model were time-varying, except for sex, age (at baseline) and~~  
8  
9 ~~country of birth.~~ The regression coefficients from these models were  
10  
11 ~~exponentiated and interpreted as hazard ratios noting that care is required~~  
12  
13 ~~with this interpretation<sup>17</sup> since the model does not technically define~~  
14  
15 ~~proportional hazards in the presence of time-varying variables.~~  
16  
17  
18  
19  
20  
21  
22  
23  
24

25 The obese-years ~~construct~~metric was analysed both as a continuous and as a  
26  
27 categorical variable using ~~a similar the same~~ categories as using in the previous  
28  
29 study<sup>7</sup> for comparison purposes. For ~~continuous~~ analyses ~~of continuous obese-~~  
30  
31 ~~years~~, hazard ratios ~~were are~~ presented per 10 obese-years. For ~~analyses of~~  
32  
33 categorical ~~obese-years, those participants~~ who ~~were~~ never obese during study  
34  
35 follow-up (zero obese-years) ~~were was~~ assigned as a comparator ~~(reference~~  
36  
37 ~~category) and the level of Those who values of obese-years within the study~~  
38  
39 ~~follow-up period, then~~ obese-years was grouped into short, medium ~~and~~ long  
40  
41 ~~and extensive~~ periods representing 1-24.9, 25-49.9, 50-74.9 and  $\geq 75$  obese-  
42  
43 years. Hazard ratios ~~were are~~ presented, both as crude hazard ratios and as  
44  
45 multivariate-adjusted hazard ratios for both continuous and categorical  
46  
47 ~~variable versions of obese-years~~. Three models ~~of analysis~~ were used to  
48  
49  
50  
51  
52  
53  
54  
55  
56  
57  
58  
59  
60



1  
2  
3 examine the ~~change in~~ hazard ratios ~~associated~~ with the addition of different  
4  
5 confounding variables. Model 1 was adjusted for age. Model 2 was adjusted for  
6  
7 age, sex, marital status, educational level and country of birth. Model 3  
8  
9  
10 includes sd adjustment for all variables in model 2 plus the health behavior  
11  
12 variables of smoking status, alcohol consumption and physical activity ~~and this~~  
13  
14 ~~model was considered the primary model of the study~~. The analyses were  
15  
16 additionally stratified by sex and a test for interaction between sex/smoking  
17  
18 status and obese-years was performed ~~for all models~~.  
19  
20  
21  
22  
23  
24  
25  
26  
27

28 To compare the relative predictive values of obesity level, obesity duration and  
29  
30 the obese-years ~~construct metric~~, each of these three variables were divided  
31  
32 into an equal number of categories. One group was created for those who  
33  
34 were never obese (BMI less than 30 kg/m<sup>2</sup>) as a reference. For those with  
35  
36 obesity, ten deciles were used to create categories ~~were created~~. The  
37  
38 goodness of fit of the models incorporating each of the three variables was  
39  
40 compared using Akaike's information criterion (AIC), computed as  $-2(\log$   
41  
42 likelihood) + 2 (number of estimated parameters); with a lower AIC indicating a  
43  
44 better fit<sup>19</sup>. All analyses were performed using the Stata statistical software  
45  
46 package version 11.0 (StataCorp, College Station, TX, USA)<sup>20</sup>.  
47  
48  
49  
50  
51  
52  
53  
54  
55  
56  
57  
58  
59  
60

## Sensitivity analyses

A sensitivity analysis was performed to examine whether the associations were ~~might be~~ influenced by the imputation method for missing BMI; ~~specifically, an~~ The analysis was ~~performed repeated that by~~ included only participants with no missing values of BMI ~~in at~~ any examinations. The effect of the duration of obesity prior to baseline was tested by ~~performing extra analyses that~~ excluded those who were obese at baseline ( $n = 576$ ).

## RESULTS

### Characteristics of the Participants Respondents

Of the 5,036 eligible study participants, 1230 (24%) participants were obese for at least 2 consecutive examinations during the study follow-up. ~~Mean For~~ those who were ever obese during the study, the median cumulative duration of obesity was approximately ~~16-12~~ years (range, 2–46 years), and the ~~mean~~ median cumulative obese-years was ~~63-24~~ (range, 2–556 obese-years). 2753 (55%) participants were diagnosed with cardiovascular disease over approximately ~~during~~ 138,918 person-years of follow-up (Table 1 2).

### Incidence and Hazards Ratios for of Cardiovascular Disease

1  
2  
3 The incidence rates and adjusted hazards ratios for CVD increased with an  
4  
5 increase in the number of obese-years (Table 2-3 and Table 34). In ~~the primary~~  
6 ~~model~~ (Model 3) for males and females combined ~~the total population sample~~,  
7  
8 the adjusted hazard ratios for the categories 1–24.9, 25–49.9, 50–74.9, and ≥75  
9  
10 obese-years ~~for total population was~~ were respectively 1.31 (95% CI: 1.15-1.48),  
11  
12 1.37 (95% CI: 1.14-1.65), 1.62 (95% CI: 1.32-1.99), and 1.80 (95% CI: 1.54-2.10)  
13  
14 compared with those who were never-obese (i.e. had zero obese-years)  
15  
16 respectively. ~~A dose-response relationship (across the 5 categories) was~~  
17  
18 ~~significant (P trend= 0.001)~~. For obese-years as a continuous variable  
19  
20 analysis, with every 10 unit increase in obese-years, the adjusted hazard ratios  
21  
22 for CVD ~~was estimated to in the total population~~ increased by 4% (95% CI 3%  
23  
24 - 45%) (Table 45). There were no significant interactions between obese-years  
25  
26 categories and with sex and or smoking status, ~~but t~~ There was evidence of an  
27  
28 interaction between obese-years as a continuous variable and ~~each of~~ sex (*P*  
29  
30 value = 0.01). ~~Effect~~ The effect of obese-years was higher stronger in males  
31  
32 than in females.  
33  
34  
35  
36  
37  
38  
39  
40  
41  
42  
43  
44  
45  
46  
47

#### 48 **Comparing ~~o~~Obesity ~~construct~~Metrics and Akaike's Information Criterion** 49 **(AIC),** 50

51  
52 Table 5-6 demonstrates the risk of CVD for each of the three different  
53  
54 constructs for obesity: level of obesity (based on BMI), duration of obesity, and  
55  
56  
57  
58  
59  
60

1  
2  
3 the obese-years ~~construct metric as additive effects~~. Each construct was  
4  
5 analysed in a separate model as an additive effect and the strength of  
6  
7 association was compared using the Akaike Information Criterion (AIC). In all  
8  
9 outcomes, the AIC was lowest in the model using the -construct of obese-years  
10  
11 metric compared with the other models two constructs both in analysis by for  
12  
13 the-total population and by sex.  
14  
15  
16  
17  
18  
19  
20  
21  
22  
23  
24

### 25 26 **Sensitivity analysis**

27  
28  
29 The sensitivity analyses showed that the association between obese-years and  
30  
31 risk of CVD was similar between in a complete case analysis and the analysis  
32  
33 using imputed missing values for BMI. Exclusion of participants ~~who had no~~  
34  
35 ~~record of body mass index at baseline has no change in adjusted hazard ratio,~~  
36  
37 ~~but exclusion of those~~ who were obese at baseline showed only a slightly  
38  
39  
40 lower adjusted hazard ratio: 1.03 (95% CI: 1.01-1.05)  
41  
42  
43  
44  
45  
46  
47  
48

### 49 **DISCUSSION**

50  
51  
52 This study found that ~~the approach of~~ measuring the total effect of obesity by  
53  
54 combining the level and the duration of obesity into a single metric of obese-  
55  
56  
57  
58  
59  
60

1  
2  
3 years, is a stronger predictor ~~for of~~ the risk of CVD ~~than compared to~~ using ~~the~~  
4 duration of obesity or ~~the intensity level~~ of obesity alone. A clear dose-  
5 response relation~~ship~~ between obese-years and ~~the~~ risk of CVD was observed.  
6  
7  
8  
9  
10  
11 ~~The A~~-stronger effect was found in males than ~~in~~ females  
12  
13

14  
15  
16  
17  
18 Although the hazard ratios were very similar between ~~the~~ three different  
19 constructs, and it is not possible to perform a statistical comparison of  
20 discrimination between the models due to the fact that they are non-nested,  
21  
22 the AIC does ~~tell us indicate~~ that combining ~~the~~ level ~~of obesity~~ and ~~the~~  
23 duration ~~of obesity~~ into a single construct of obese-years provides ~~us with~~  
24 ~~more greater~~ discriminative power than a model with level of obesity ~~based on~~  
25 ~~BMI~~ or obesity duration alone. ~~However the disparity in AIC between the~~  
26 ~~competing models was not as great as was observed with diabetes as the~~  
27 ~~outcome of interest<sup>7</sup> and so it is unclear the extent to which.~~ This finding has  
28 important implications for future studies of the total health impact associated  
29 with obesity ~~and whether future studies that~~ should ~~be taken~~ into account both  
30 the impact of obesity level and changes in the duration of obesity.  
31  
32  
33  
34  
35  
36  
37  
38  
39  
40  
41  
42  
43  
44  
45  
46  
47  
48  
49  
50  
51  
52

53 There are different ways to operationalize the impact of excess weight over  
54 time. A recent systematic review identified at least four models: ~~an~~ additive  
55  
56  
57  
58  
59  
60

1  
2  
3 models, a duration-of-obesity model, an additive-weight-change model, and  
4  
5 an interactive model<sup>21</sup>. In addition to these models, findings using the obese-  
6  
7 year model ~~confirms~~ suggest that analyzing the combined effect of the  
8  
9 duration and the level of obesity as a predictor of ~~the cardiovascular~~ CVD is  
10  
11 worthwhile. Such approaches add information over and above simply the level  
12  
13 of excess weight or length of time with obesity. As has been argued previously  
14  
15  
16  
17  
18  
19 <sup>7</sup> other potential additions to this analysis is examining the excess body weight  
20  
21 as higher than 25 kg/m<sup>2</sup>.

22  
23  
24  
25  
26  
27  
28 The findings in this study were ~~is~~ derived from analysis of a long term  
29  
30 prospective cohort study with biennial measurements of body weight,  
31  
32 covariates and health outcomes which enabled us to analyze change in level of  
33  
34 obesity and ~~the~~ duration of obesity over a long ~~term~~ period. The analysis takes  
35  
36 into account changes in covariates, such as smoking status, alcohol  
37  
38 consumption and physical activity and ~~adjusted~~ adjusts for a large number of  
39  
40 potential confounding variables. However, some potential confounders, such  
41  
42 as diet, were not collected consistently in the ~~original~~ Framingham Heart Study  
43  
44 and therefore have not been adjusted for in ~~this study~~ your analysis.

1  
2  
3 As has been described elsewhere<sup>7</sup>, the limitation of this analysis might related  
4 ~~to the population of study us being~~ a relatively old cohort study, ~~of the~~  
5 ~~original~~ Framingham Heart Study that began in 1948, and the prevalence rates  
6 of obesity ~~and cardiovascular disease~~ CVD were relatively low at that time (in  
7 the 1950s was below 10%)<sup>22</sup>. ~~Therefore some people It could be~~ argued ~~that~~  
8 the results of this study might not reflect ~~contemporary the current~~  
9 populations, where the prevalence of obesity is markedly higher than 50 years  
10 ago. In 2008 ~~alone~~, the prevalence of obesity among adults in the United  
11 States was more than 30%<sup>23 24</sup>. Moreover, the contemporary obesity epidemic  
12 is also characterized by a much earlier onset of obesity, which ~~should could~~  
13 result in even longer exposure by the time today's obese generation of  
14 children reach the age of our studied cohort. In our study, the average age at  
15 onset of obesity was approximately 50 years, and the average number of years  
16 lived with obesity was approximately 13 years but, in today's society, the  
17 average age at onset of obesity is likely to be more than 10 years earlier than  
18 in previous decades<sup>25</sup>. ~~However~~ ~~Nevertheless~~, our results indicate that ~~the~~  
19 obese-years ~~construct~~ metric is still valid and ~~may provide more precision in~~  
20 ~~predicting the risk of CVD is a better tool~~ than level of BMI or duration ~~of~~  
21 ~~obesity~~ alone. ~~If further analysis is conducted, the association between obese-~~  
22 ~~years and CVD could be even stronger today since the exposure to obesity is~~  
23 ~~now greater than it was.~~

1  
2  
3  
4  
5  
6 The obese-years ~~construct~~metric in this study was based on the measurement  
7  
8 of BMI. It is unclear whether using anthropometric measures other than BMI  
9  
10 would produce different results. Although a recent meta-analysis study has  
11  
12 showed that BMI, waist circumference (WC), and the waist/hip ratio (WHR) ~~to~~  
13  
14 each estimate a similar risk, particularly for type-2 diabetes<sup>26</sup>; it is still  
15  
16 worth while ~~to~~ explore the relationship between obese-years and risk of CVD  
17  
18 using WC or WHR.  
19  
20  
21  
22  
23  
24  
25  
26  
27

28 As discussed in our previous study<sup>7</sup>, the obese-years metric was developed  
29  
30 based on the assumption that level and duration of obesity ~~–~~ have a similar  
31  
32 impact, an assumption that has been used for the concept of pack-years in  
33  
34 smoking studies. In some smoking studies, it was highlighted that for certain  
35  
36 health outcomes, the effect of the duration was more important than  
37  
38 intensity<sup>27</sup>, while in others, duration was not significant after adjustment for  
39  
40 intensity<sup>28</sup>. ~~As this is a new concept in obesity studies, it requires further~~  
41  
42 ~~exploration. As we have previously discussed, the~~ notion that obese-years is  
43  
44 only “switched on” when BMI reaches 30 kg/m<sup>2</sup> is crude<sup>7</sup>, however it is an  
45  
46 important construct to consider whether the combination of intensity level and  
47  
48 duration is relevant for a particular outcome. In addition, although ~~it obese-~~  
49  
50  
51  
52  
53  
54  
55  
56  
57  
58  
59  
60



1  
2  
3 years does find a parallel in pack-years for smoking, which is a construct that  
4  
5 ignores any effects of passive smoking, the nature of cumulative of exposure in  
6  
7 obesity e-years measurement is not as straightforward as in smoking. As this  
8  
9 is a new concept in obesity studies, it requires further exploration.  
10  
11  
12  
13  
14  
15  
16  
17  
18  
19  
20  
21  
22  
23

24 ~~This~~ These findings demonstrate ~~one again~~ that it is important to consider not  
25  
26 only the level of obesity but also the duration of obesity and ~~its~~ their  
27  
28 combination when examining the association between obesity and the risk of  
29  
30 chronic disease. This effect is likely to be because ~~it~~ the obese-years  
31  
32 construct metric takes into account ~~is taken of~~ the cumulative damage of  
33  
34 obesity ~~onto~~ body systems, and consequently is likely to be applicable to other  
35  
36 chronic diseases. However, further investigations are recommended to be  
37  
38 undertaken, of other possible intensity level/duration constructs of obesity such  
39  
40 as considering the effect of BMI above 25 kg/m<sup>2</sup>, and of relationships between  
41  
42 obese-years and other chronic diseases and mortality.  
43  
44  
45  
46  
47  
48  
49  
50  
51  
52

53 We acknowledge that a major challenge in examining the obese-years metric is  
54  
55 to have information on both the degree of obesity and the duration of obesity.  
56  
57  
58  
59  
60

1  
2  
3 Few cohort studies measure obesity and health outcomes regularly as in the  
4 FHS. However, we believe there would be value in more detailed assessment of  
5 height and weight on multiple repeated occasions in future cohort studies and  
6 to identify other more readily available proxies of duration, such as peak  
7 weight or age of onset of obesity and to test to what extent those variables are  
8 equivalent to the obese-year metric.  
9  
10  
11  
12  
13  
14  
15  
16  
17  
18  
19  
20

21 It is important that these results inform future epidemiological analyses,  
22 suggesting that the risk of obesity on some health outcomes is being  
23 underestimated if duration is not being taken into account. This has  
24 consequent implications for underestimation of obesity-related burden of  
25 disease modelling and cost-effectiveness analyses. In addition, the results  
26 inform public health policy, demonstrating further rationale for preventing  
27 weight gain and delaying the onset of obesity.  
28  
29  
30  
31  
32  
33  
34  
35  
36  
37  
38  
39  
40  
41  
42  
43  
44  
45

## 46 **CONCLUSION**

47  
48  
49 This study ~~suggested possible value in~~ demonstrates the importance of  
50 ~~measuring the total effect of obesity by combining both the level and the~~  
51 ~~duration of obesity when estimating~~ demonstrates that the risk of  
52  
53  
54  
55  
56  
57  
58  
59  
60

1  
2  
3 ~~cardiovascular disease~~CVD associated with obesity is derived both from the  
4  
5 level of obesity attained and also the length of time lived with obesity. The  
6  
7 obese-years ~~construct~~metric conceptually captures ~~might take into account of~~  
8  
9 the cumulative damage of obesity on body systems, and is found to therefore  
10  
11 provides ~~slightly better~~more precise estimation of the risk of CVD than level or  
12  
13 the duration of obesity alone. ~~This approach of examining total effect of~~  
14  
15 ~~obesity is suggested to use in measuring the burden of obesity related~~  
16  
17 ~~diseases in the community.~~  
18  
19  
20  
21  
22  
23  
24  
25  
26

#### 27 **CONFLICT OF INTEREST:**

28  
29 None declared.  
30  
31  
32  
33  
34

#### 35 **ACKNOWLEDGMENTS**

36  
37 The authors thank the Framingham Heart Study investigators for granting them  
38  
39 permission to use their data set for this study (the Framingham Heart Study is  
40  
41 conducted and supported by the National Heart, Lung, and Blood Institute  
42  
43 (NHLBI) in collaboration with study investigators). This article was prepared by  
44  
45 using a limited-access data set obtained from the NHLBI and does not  
46  
47 necessarily reflect the opinions or views of the Framingham Heart Study or the  
48  
49  
50  
51  
52  
53  
54  
55  
56  
57  
58  
59  
60  
NHLBI.

## CONTRIBUTORS

Author AA developed the analytical techniques of study, performed data analysis, interpretation, drafting of the article and prepared the final version for publication; FAA performed data analysis and interpretation of data; JS, ST, and JB helped review the data analysis and reviewed the article; RW contributed to the study design and reviewing of the article; and AP supervised the implementation of the study, designed the study's analytic strategy, and reviewing of the article.

## SOURCES OF FUNDING

A. A. and F.A.A. were supported by an Indonesian Danone institutional research grant 2012. A. P. and S. T. by ~~the an~~ NHMRC project grant.

## REFERENCES

1. Hubert HB, Feinleib M, McNamara PM, et al. Obesity as an independent risk factor for cardiovascular disease: A 26-year follow-up of participants in the Framingham Heart Study. *Circulation* 1983;**67**(5):968-77.
2. Morrison JA. Obesity and cardiovascular disease risk factors in Black and White girls: The NHLBI Growth and Health Study. *Am J Public Health* 1992;**82**(12):1613-20.
3. Abdullah A., Stoelwinder A., De Courten M., et al. The Duration of Obesity and the Risk of Cardiovascular Disease. The Conference on Clinical Epidemiology and Evidence-Based Medicine in Global Perspective 27-28 November. Bali, Indonesia, 2010.
4. Abdullah A, Stoelwinder J, Shortreed S, et al. The duration of obesity and the risk of type 2 diabetes. *Public Health Nutr* 2011;**14**(1):119-26.
5. Abdullah A, Wolfe R, Stoelwinder JU, et al. The number of years lived with obesity and the risk of all-cause and cause-specific mortality. *Int J Epidemiol* 2011;**40**(4):985-96.
6. He J, McGee D, Niu X, et al. Examining the dynamic association of BMI and mortality in the Framingham Heart Study. *Int J Environ Res Public Health* 2009;**6**(12):3115-26.
7. Abdullah A, Wolfe R, Mannan H, et al. Epidemiologic merit of obese-years, the combination of degree and duration of obesity. *Am J Epidemiol* 2012;**176**(2):99-107.
8. Leffondre K, Abrahamowicz M, Siemiatycki J, et al. Modeling smoking history: a comparison of different approaches. *Am J Epidemiol* 2002;**156**(9):813-23.
9. Neuner B, Wellmann J, Dasch B, et al. Modeling smoking history: a comparison of different approaches in the MARS study on age-related maculopathy. *Ann Epidemiol* 2007;**17**(8):615-21.
10. Dietrich T, Hoffmann K. A comprehensive index for the modeling of smoking history in periodontal research. *J Dent Res* 2004;**83**(11):859-63.
11. Dawber T. *The Framingham study: the epidemiology of atherosclerotic disease*. Cambridge, Mass.: Harvard University Press, 1980.
12. National Heart L, and Blood Institute, Boston University. The Framingham Heart Study: 50 years of research success. Framingham, MA: Framingham Heart Study; 2012. (<http://www.nhlbi.nih.gov/about/framingham/index.html>). (Accessed November 5, 2012).
13. D'Agostino RB, Sr., Vasan RS, Pencina MJ, et al. General cardiovascular risk profile for use in primary care: the Framingham Heart Study. *Circulation* 2008;**117**(6):743-53.
14. Wilson PWF, D'Agostino RB, Sullivan L, et al. Overweight and obesity as determinants of cardiovascular risk: the Framingham experience. *Arch Intern Med* 2002;**162**(16):1867-72.
15. Parmar MKB, Machin D. *Survival analysis : a practical approach*. Chichester ; New York: J. Wiley, 1995.
16. Fisher LD, Lin DY. Time-Dependent Covariates in The Cox Proportional-Hazards Regression Model. *Annual Review of Public Health* 1999;**20**(1):145-57.

17. Kleinbaum DG, Klein M. *Survival Analysis: A Self-Learning Text*. the United States of America: Springer, 2005.
18. Cleophas TJM, Zwinderman AH. *Machine Learning in Medicine*. Dordrecht: Springer, 2013.
19. Akaike H. A new look at the statistical model identification. *IEEE Transactions on Automatic Control* 1974;**19**(6):716–23.
20. StataCorp LP. *Stata Survival Analysis and Epidemiological Tables Reference Manual Release 10*. College Station, TX: Stata Corporation 2007.
21. Preston SH, Mehta NK, Stokes A. Modeling obesity histories in cohort analyses of health and mortality. *Epidemiology* 2013;**24**(1):158-66.
22. National Center for Health Statistics National *HaNESH*, MD: National Center for Health Statistics; (<http://www.cdc.gov/nchs/nhanes.htm>). (Accessed 3 November 2002). Secondary.
23. CDC. State-Specific Prevalence of Obesity Among Adults — United States. *MMWR* 2008;**57**(36):765-8.
24. World Health Organization. Global Database on Body Mass Index. Secondary Global Database on Body Mass Index 2014. <http://apps.who.int/bmi/index.jsp>.
25. Lee JM, Pilli S, Gebremariam A, et al. Getting heavier, younger: trajectories of obesity over the life course. *Int J Obes (Lond)* 2010;**34**(4):614-23.
26. Vazquez G, Duval S, Jacobs DR, Jr., et al. Comparison of Body Mass Index, Waist Circumference, and Waist/Hip Ratio in Predicting Incident Diabetes: A Meta-Analysis. *Epidemiol Rev* 2007;**29**(1):115-28.
27. Lagergren J, Bergström R, Lindgren A, et al. The role of tobacco, snuff and alcohol use in the aetiology of cancer of the oesophagus and gastric cardia. *Int J Cancer* 2000;**85**(3):340-6.
28. Yuan JM, Wang XL, Xiang YB, et al. Non-dietary risk factors for nasopharyngeal carcinoma in Shanghai, China. *Int J Cancer* 2000;**85**(3):364-9.

Table 1: Illustration of the Calculation of an Obese-Years Metric for a Single Hypothetical Individual

| ID | Examination  | Interval<br>Between<br>Examinations,<br>years <sup>a</sup> | Body<br>Mass<br>Index <sup>b</sup> | Degree of<br>Obesity | Duration of<br>Obesity, years | Obese-Years <sup>a</sup> | Cumulative<br>Obese-Years |
|----|--------------|------------------------------------------------------------|------------------------------------|----------------------|-------------------------------|--------------------------|---------------------------|
| 6  | 1 (baseline) | -                                                          | 28                                 | 0                    | -                             | 0                        | 0                         |
| 6  | 2            | 2                                                          | 30                                 | 1                    | 0                             | 0                        | 0                         |
| 6  | 3            | 2                                                          | 32                                 | 3                    | 2                             | 2                        | 2                         |
| 6  | 4            | 3                                                          | 34                                 | 5                    | 3                             | 9                        | 11                        |
| 6  | 5            | 1                                                          | 32                                 | 3                    | 1                             | 5                        | 16                        |
| 6  | 6            | 2                                                          | 30                                 | 1                    | 2                             | 6                        | 22                        |
| 6  | 7            | 1.5                                                        | 28                                 | 0                    | 1.5                           | 1.5                      | 23.5                      |
| 6  | 8            | 2.5                                                        | 28                                 | 0                    | 0                             | 0                        | 23.5                      |
| 6  | 9            | 2                                                          | 30                                 | 1                    | 0                             | 0                        | 23.5                      |
| 6  | 10           | 1.5                                                        | 32                                 | 3                    | 1.5                           | 1.5                      | 25                        |
| 6  | 11           | 3                                                          | 34                                 | 5                    | 3                             | 9                        | 34                        |
| 6  | 12           | 2                                                          | 32                                 | 3                    | 2                             | 10                       | 44                        |
| 6  | 13           | 2                                                          | 30                                 | 1                    | 2                             | 6                        | 50                        |

<sup>a</sup> All intervals refer to the interval between the current examination and the prior examination

<sup>b</sup> Body mass index; weight (kg)/height (m)<sup>2</sup>.

Table 2: Characteristics of the study population<sup>a</sup>

| Participant Characteristics                                       | Number |       |         | Percentage |       |         | Median |       |         | Range     |           |           | P value <sup>e</sup> |
|-------------------------------------------------------------------|--------|-------|---------|------------|-------|---------|--------|-------|---------|-----------|-----------|-----------|----------------------|
|                                                                   | Total  | Males | Females | Total      | Males | Females | Total  | Males | Females | Total     | Males     | Females   |                      |
| Eligible sample                                                   | 5,036  | 2,237 | 2,799   | 100        | 44    | 46      |        |       |         |           |           |           |                      |
| Participants ever obese during study follow-up                    | 1,247  | 494   | 750     | 24.7       | 40    | 60      |        |       |         |           |           |           | 0.000                |
| Age at baseline (years)                                           |        |       |         |            |       |         | 43     | 43    | 43      | 28–62     | 29–62     | 28–62     | 0.483                |
| Born in the United States                                         | 4,082  | 1,826 | 2,256   | 81         | 44.7  | 55.3    |        |       |         |           |           |           | 0.355                |
| Marital status                                                    |        |       |         |            |       |         |        |       |         |           |           |           | 0.000                |
| Single                                                            | 452    | 117   | 335     | 9          | 5     | 12      |        |       |         |           |           |           |                      |
| Married                                                           | 4,269  | 2,075 | 2,194   | 85         | 93    | 78      |        |       |         |           |           |           |                      |
| Widowed, divorced, or separated                                   | 315    | 45    | 270     | 6          | 2     | 10      |        |       |         |           |           |           |                      |
| Educational level                                                 |        |       |         |            |       |         |        |       |         |           |           |           | 0.000                |
| Eighth grade or less                                              | 1,374  | 616   | 758     | 27         | 28    | 27      |        |       |         |           |           |           |                      |
| High school                                                       | 2,306  | 1,022 | 1,284   | 46         | 46    | 46      |        |       |         |           |           |           |                      |
| College                                                           | 752    | 392   | 360     | 15         | 18    | 13      |        |       |         |           |           |           |                      |
| Graduate school                                                   | 604    | 207   | 397     | 12         | 9     | 14      |        |       |         |           |           |           |                      |
| Health behavior                                                   |        |       |         |            |       |         |        |       |         |           |           |           |                      |
| Current smoker at baseline                                        | 2,583  | 1,435 | 1,154   | 52         | 55    | 45      |        |       |         |           |           |           | 0.000                |
| Ever-smoker during study follow-up period                         | 3,178  | 1,837 | 1,341   | 63         | 58    | 42      |        |       |         |           |           |           | 0.000                |
| Physical activity score at examination 4                          |        |       |         |            |       |         | 32     | 33    | 31      | 25–83     | 25–83     | 25–55     | 0.000                |
| Alcohol drinking at examination 2, yes, ounces/month <sup>b</sup> | 3,183  | 1,648 | 1,535   | 63         | 52    | 48      | 8      | 15    | 4       | 1–360     | 1–360     | 1–240     | 0.000                |
| Body weight characteristics                                       |        |       |         |            |       |         |        |       |         |           |           |           |                      |
| Body mass index at baseline (kg/m <sup>2</sup> ) <sup>c</sup>     |        |       |         |            |       |         | 25.1   | 25.6  | 24.6    | 16.2–46.3 | 16.8–38.1 | 16.2–46.3 | 0.000                |
| Underweight (<18.5)                                               | 65     | 14    | 51      | 1          | 1     | 2       |        |       |         |           |           |           | 0.000                |
| Normal weight (18.5–24.9)                                         | 2,405  | 945   | 1,460   | 48         | 42    | 52      |        |       |         |           |           |           |                      |
| Overweight (25–29.9)                                              | 1,989  | 1,057 | 932     | 40         | 47    | 33      |        |       |         |           |           |           |                      |
| Obese (≥30)                                                       | 567    | 217   | 350     | 11         | 10    | 13      |        |       |         |           |           |           |                      |
| Cumulative obesity duration (years) <sup>d</sup>                  |        |       |         |            |       |         | 12     | 10    | 12      | 2–46      | 2–46      | 2–46      | 0.001                |
| Cumulative obese-years <sup>d</sup>                               |        |       |         |            |       |         | 24     | 15    | 31      | 2–556     | 2–251     | 2–556     | 0.000                |
| Cumulative obese-years category <sup>d</sup>                      |        |       |         |            |       |         |        |       |         |           |           |           | 0.000                |
| 1–24.9                                                            | 579    | 269   | 319     | 52         | 62    | 45      |        |       |         |           |           |           |                      |
| 25–49.9                                                           | 192    | 77    | 115     | 17         | 18    | 17      |        |       |         |           |           |           |                      |
| 50–74.9                                                           | 119    | 31    | 87      | 11         | 7     | 13      |        |       |         |           |           |           |                      |



1  
2  
3  
4  
5  
6  
7  
8  
9  
10  
11  
12  
13  
14  
15  
16  
17  
18  
19  
20  
21  
22  
23  
24  
25  
26  
27  
28  
29  
30  
31  
32  
33  
34  
35  
36  
37  
38  
39  
40  
41  
42  
43  
44  
45  
46  
47  
48  
49

| Participant Characteristics               | Number |       |         | Percentage |       |         | Median |       |         | Range |       | P value <sup>e</sup> |
|-------------------------------------------|--------|-------|---------|------------|-------|---------|--------|-------|---------|-------|-------|----------------------|
|                                           | Total  | Males | Females | Total      | Males | Females | Total  | Males | Females | Total | Males |                      |
| ≥75                                       | 233    | 54    | 179     | 21         | 13    | 26      |        |       |         |       |       |                      |
| Cardiovascular disease (any types of CVD) | 2753   | 1,375 | 1,378   | 55         | 50    | 50      |        |       |         |       |       | 0.000                |
| Hard CVD                                  | 1890   | 952   | 938     | 38         | 51    | 49      |        |       |         |       |       | 0.000                |
| Coronary heart disease                    | 1872   | 1036  | 836     | 37         | 55    | 45      |        |       |         |       |       | 0.000                |
| Heart attack                              | 1538   | 920   | 618     | 31         | 60    | 40      |        |       |         |       |       | 0.000                |
| Myocardial infarction                     | 1105   | 666   | 439     | 22         | 60    | 40      |        |       |         |       |       | 0.000                |
| Coronary insufficiency                    | 259    | 146   | 113     | 5          | 56    | 44      |        |       |         |       |       | 0.000                |
| Angina pectoris                           | 945    | 498   | 447     | 19         | 53    | 47      |        |       |         |       |       | 0.000                |
| Cerebrovascular accident                  | 950    | 411   | 539     | 19         | 43    | 57      |        |       |         |       |       | 0.426                |
| Congestive heart failure                  | 876    | 397   | 479     | 17         | 45    | 55      |        |       |         |       |       | 0.556                |

<sup>a</sup> Participants were free from existing diabetes, cardiovascular disease, and cancer at baseline.

<sup>b</sup> One ounce ≈ 28.35 g. <sup>c</sup> Body mass index: weight (kg)/height (m)<sup>2</sup>.

<sup>d</sup> For those who were obese during study follow-up.

<sup>e</sup> This P value is for the comparison of males vs females.

For peer review only

Table 3: Incidence of Cardiovascular Disease (Events/1,000 Person-Years) According to Categories of Cumulative Obese-Years

|                         | Obese-Years | Events | PYFU    | Incident Rate       |
|-------------------------|-------------|--------|---------|---------------------|
| <b>Total population</b> |             |        |         |                     |
|                         | 0 year      | 2,177  | 116,681 | 18.66 (17.89-19.46) |
|                         | 1-25 years  | 276    | 10,846  | 25.45 (22.62-28.63) |
|                         | 25-50 years | 124    | 4,509   | 27.50 (23.06-32.80) |
|                         | 50-75 years | 78     | 2,365   | 32.98 (26.42-41.18) |
|                         | >=75years   | 186    | 4,517   | 41.17 (35.66-47.54) |
| <b>Males</b>            |             |        |         |                     |
|                         | 0 year      | 1,138  | 46,950  | 24.24 (22.87-25.69) |
|                         | 1-25 years  | 134    | 4,669   | 28.70 (24.23-34.00) |
|                         | 25-50 years | 56     | 1,710   | 32.75 (25.21-42.56) |
|                         | 50-75 years | 36     | 720     | 50.02 (36.08-69.34) |
|                         | >=75years   | 49     | 951     | 51.51 (38.93-68.16) |
| <b>Females</b>          |             |        |         |                     |
|                         | 0 year      | 1,039  | 69,731  | 14.90 (14.02-15.83) |
|                         | 1-25 years  | 142    | 6,177   | 22.99 (19.50-27.10) |
|                         | 25-50 years | 68     | 2,799   | 24.30 (19.16-30.81) |
|                         | 50-75 years | 42     | 1,645   | 25.53 (18.87-34.54) |
|                         | >=75years   | 137    | 3,566   | 38.42 (32.49-45.42) |

PYFU = Persons years of follow-up

Table 4: Risk of Cardiovascular Disease According to Categories of Obese-Years Category

|                       | Hazard Ratio (95% Confidence Interval) |                  |                  |
|-----------------------|----------------------------------------|------------------|------------------|
|                       | Total population*                      | Males            | Females          |
| <b>Model 1</b>        |                                        |                  |                  |
| 0 obese-years         | 1                                      | 1                | 1                |
| 1-25 obese-years      | 1.28 (1.13-1.45)                       | 1.18 (0.99-1.41) | 1.37 (1.15-1.64) |
| 25-50 obese-years     | 1.31 (1.09-1.57)                       | 1.28 (0.97-1.67) | 1.40 (1.09-1.79) |
| 50-75 obese-years     | 1.50 (1.21-1.85)                       | 1.78 (1.35-2.36) | 1.46 (1.08-1.96) |
| >=75 obese-years      | 1.59 (1.36-1.85)                       | 1.72 (1.33-2.22) | 1.78 (1.48-2.15) |
| Dose-response P value | 0.0001                                 | 0.0001           | 0.0001           |
| <b>Model 2</b>        |                                        |                  |                  |
| 0 obese-years         | 1                                      | 1                | 1                |
| 1-25 obese-years      | 1.26 (1.11-1.43)                       | 1.18 (0.99-1.41) | 1.33 (1.11-1.60) |
| 25-50 obese-years     | 1.32 (1.10-1.59)                       | 1.29 (0.99-1.70) | 1.35 (1.05-1.74) |
| 50-75 obese-years     | 1.55 (1.27-1.91)                       | 1.80 (1.36-2.38) | 1.40 (1.04-1.88) |
| >=75 obese-years      | 1.74 (1.50-2.03)                       | 1.71 (1.32-2.21) | 1.71 (1.42-2.07) |
| Dose-response P value | 0.0001                                 | 0.0001           | 0.0001           |
| <b>Model 3</b>        |                                        |                  |                  |
| 0 obese-years         | 1                                      | 1                | 1                |
| 1-25 obese-years      | 1.31 (1.15-1.48)                       | 1.22 (1.02-1.45) | 1.37 (1.14-1.65) |
| 25-50 obese-years     | 1.37 (1.14-1.65)                       | 1.39 (1.05-1.83) | 1.36 (1.05-1.76) |
| 50-75 obese-years     | 1.62 (1.32-1.99)                       | 1.89 (1.42-2.51) | 1.44 (1.08-1.94) |
| >=75 obese-years      | 1.80 (1.54-2.10)                       | 1.81 (1.39-2.36) | 1.74 (1.44-2.10) |
| Dose-response P value | 0.0001                                 | 0.0001           | 0.0001           |

Model 1 adjusted for age.

Model 2 adjusted for age, marital status, education, country of birth.

Model 3 adjusted for age, marital status, education, country of birth, smoking status, alcohol consumption, physical activity

\* Analyses for total population were adjusted for sex.

Table 5: The Hazard Ratio of Cardiovascular ~~d~~Disease per 10 Obese-Years

| CVD                                            | Hazard Ratio per additional 10 Obese-Years (95% Confidence Interval) |                         |                         |
|------------------------------------------------|----------------------------------------------------------------------|-------------------------|-------------------------|
|                                                | Total population*                                                    | Males                   | Females                 |
| <b>Cardiovascular diseases (all types CVD)</b> |                                                                      |                         |                         |
| Model 1                                        | 1.03 (95% CI 1.02-1.04)                                              | 1.05 (95% CI 1.03-1.07) | 1.03 (95% CI 1.02-1.04) |
| Model 2                                        | 1.03 (95% CI 1.02-1.04)                                              | 1.05 (95% CI 1.03-1.07) | 1.03 (95% CI 1.02-1.04) |
| Model 3                                        | 1.04 (95% CI 1.03-1.05)                                              | 1.06 (95% CI 1.04-1.08) | 1.03 (95% CI 1.02-1.04) |
| <b>Hard Cardiovascular diseases (Hard CVD)</b> |                                                                      |                         |                         |
| Model 1                                        | 1.03 (95% CI 1.02-1.04)                                              | 1.06 (95% CI 1.04-1.08) | 1.03 (95% CI 1.02-1.05) |
| Model 2                                        | 1.04 (95% CI 1.03-1.05)                                              | 1.06 (95% CI 1.04-1.08) | 1.03 (95% CI 1.02-1.04) |
| Model 3                                        | 1.04 (95% CI 1.03-1.05)                                              | 1.06 (95% CI 1.04-1.08) | 1.03 (95% CI 1.02-1.04) |
| <b>Coronary heart disease (CHD)</b>            |                                                                      |                         |                         |
| Model 1                                        | 1.02 (95% CI 1.01-1.03)                                              | 1.03 (95% CI 1.01-1.06) | 1.03 (95% CI 1.02-1.04) |
| Model 2                                        | 1.03 (95% CI 1.02-1.04)                                              | 1.03 (95% CI 1.01-1.06) | 1.03 (95% CI 1.02-1.04) |
| Model 3                                        | 1.03 (95% CI 1.02-1.04)                                              | 1.04 (95% CI 1.02-1.06) | 1.03 (95% CI 1.02-1.04) |
| <b>Cerebrovascular accident (CVA)</b>          |                                                                      |                         |                         |
| Model 1                                        | 1.03 (95% CI 1.02-1.04)                                              | 1.06 (95% CI 1.04-1.09) | 1.03 (95% CI 1.01-1.04) |
| Model 2                                        | 1.03 (95% CI 1.02-1.04)                                              | 1.06 (95% CI 1.04-1.09) | 1.02 (95% CI 1.01-1.04) |
| Model 3                                        | 1.03 (95% CI 1.02-1.04)                                              | 1.06 (95% CI 1.04-1.09) | 1.02 (95% CI 1.01-1.04) |
| <b>Congestive heart failure (CHF)</b>          |                                                                      |                         |                         |
| Model 1                                        | 1.05 (95% CI 1.03-1.06)                                              | 1.06 (95% CI 1.04-1.09) | 1.05 (95% CI 1.03-1.06) |
| Model 2                                        | 1.05 (95% CI 1.04-1.06)                                              | 1.06 (95% CI 1.04-1.09) | 1.04 (95% CI 1.03-1.06) |
| Model 3                                        | 1.05 (95% CI 1.04-1.06)                                              | 1.06 (95% CI 1.04-1.09) | 1.04 (95% CI 1.03-1.06) |

Model 1 adjusted for age.

Model 2 adjusted for age, marital status, education, country of birth.

Model 3 adjusted for age, marital status, education, country of birth, smoking status, alcohol consumption, physical activity

\* For total population also adjusted for sex

Table 6: Comparison of the Obese-Years ~~construct~~Metric, Body Mass Index and Obesity Duration as Predictors of the Risk ~~effor~~ for Cardiovascular Disease~~CVD~~

| Constructs                                     | Akaike Information Criterion (AIC) |       |         |
|------------------------------------------------|------------------------------------|-------|---------|
|                                                | Total population                   | Males | Females |
| <b>Cardiovascular diseases (all types CVD)</b> |                                    |       |         |
| Construct 1: Level of BMI                      | 43390                              | 19227 | 20307   |
| Construct 2: Duration of obesity               | 43379                              | 19221 | 20306   |
| Construct 3: Obese-Years                       | 43368                              | 19209 | 20294   |
| <b>Hard Cardiovascular diseases (Hard CVD)</b> |                                    |       |         |
| Construct 1: Level of BMI                      | 34069                              | 15102 | 15976   |
| Construct 2: Duration of obesity               | 34065                              | 15099 | 15968   |
| Construct 3: Obese-Years                       | 34050                              | 15096 | 15955   |
| <b>Coronary heart disease (CHD)</b>            |                                    |       |         |
| Construct 1: Level of BMI                      | 29038                              | 14355 | 12156   |
| Construct 2: Duration of obesity               | 29039                              | 14354 | 12162   |
| Construct 3: Obese-Years                       | 29028                              | 14351 | 12152   |
| <b>Cerebrovascular accident (CVA)</b>          |                                    |       |         |
| Construct 1: Level of BMI                      | 13575                              | 5211  | 7147    |
| Construct 2: Duration of obesity               | 13577                              | 5208  | 7141    |
| Construct 3: Obese-Years                       | 13573                              | 5208  | 7136    |
| <b>Congestive health failure (CHF)</b>         |                                    |       |         |
| Construct 1: Level of BMI                      | 13141                              | 5275  | 6667    |
| Construct 2: Duration of obesity               | 13122                              | 5263  | 6663    |
| Construct 3: Obese-Years                       | 13104                              | 5255  | 6649    |

Each construct was split into 11 categories; 1 represents "not obese" and 2-11 represent deciles of obesity exposure (intensitylevel, duration and obese-years)

Each model adjusted for sex, age, marital status, education, smoking, alcohol consumption, and physical activity.
